1 **Protistan plankton communities in the Galápagos Archipelago respond to changes in deep water**  
2 **masses resulting from the 2015/16 El Niño**

3 Erika F. Neave<sup>1,2,3</sup> (e.neave@nhm.ac.uk), Harvey Seim<sup>1</sup> (hseim@email.unc.edu), Scott Gifford<sup>1</sup>  
4 (sgifford@email.unc.edu), Olivia Torano<sup>1</sup> (omtorano@email.unc.edu), Zackary I. Johnson<sup>4</sup>  
5 (Zackary.johnson@duke.edu), Diego Páez-Rosas<sup>5</sup> (dpaez@usfq.edu.ec) and Adrian Marchetti<sup>1\*</sup>

6 **Affiliations:**

7 <sup>1</sup> Department of Marine Sciences, University of North Carolina at Chapel Hill, Chapel Hill, NC,  
8 USA

9 <sup>2</sup> Present address: Department of Life Sciences, Natural History Museum, London, UK

10 <sup>3</sup> Present address: School of Biological and Environmental Sciences, Liverpool John Moores  
11 University, Liverpool, UK

12 <sup>4</sup> Marine Laboratory and Biology Department, Duke University, Beaufort, NC, USA

13 <sup>5</sup> Galápagos Science Center, Universidad San Francisco de Quito, Isla San Cristóbal, Islas  
14 Galápagos, Ecuador

15 **\*For correspondence:**

16 Dr. Adrian Marchetti

17 Department of Marine Sciences

18 University of North Carolina at Chapel Hill

19 3202 Venable Murray Hall CB 3300

20 Chapel Hill, NC 27599-3300, USA

21 Email: [amarchetti@unc.edu](mailto:amarchetti@unc.edu)

22 Tel. (+1) 919 843 3473

23 Fax (+1) 919 962 1254

24 **Author Contributions:**

25 E.F.N – study conception, data acquisition, data analysis, draft manuscript, approved manuscript

26 H.S. – data acquisition, data analysis, draft manuscript, approved manuscript

27 S.G. – draft manuscript, approved manuscript

28 O.T. – data acquisition, approved manuscript

29 Z.I.J – data acquisition, approved manuscript

30 D.P-R. – data acquisition, approved manuscript

31 A.M. – study conception, data acquisition, data analysis, draft manuscript, approved manuscript

32

33 **ORCIDs:**

34 E.F.N: 0000-0002-0410-0338

35 H.S: 0000-0002-1562-0849

36 S.G: 0000-0002-3222-9681

37 Z.I.J.: 0000-0003-0793-8512

38 D.P-R: 0000-0002-2446-9888

39 A.M: 0000-0003-4608-4775

40

41 **Conflict of interest**

42 The authors declare that they have no conflict of interest.

43

44

45

46

47 **Abstract**

48           The Galápagos Archipelago lies within the eastern equatorial Pacific Ocean at the  
49 convergence of major ocean currents that are subject to changes in circulation. The nutrient-rich  
50 Equatorial Undercurrent upwells from the west onto the Galápagos platform, stimulating primary  
51 production, but this source of deep water weakens during El Niño events. From measurements  
52 collected on repeat cruises, the 2015/16 El Niño was associated with declines in phytoplankton  
53 biomass at most sites throughout the archipelago and reduced utilization of nitrate, particularly in  
54 large-sized phytoplankton in the western region. Protistan assemblages were identified by  
55 sequencing the V4 region of the 18S rRNA gene. Dinoflagellates, chlorophytes, and diatoms  
56 dominated most sites. Shifts in dinoflagellate communities were most apparent between the  
57 years; parasitic dinoflagellates, *Syndiniales*, were highly detected during the El Niño (2015)  
58 while the dinoflagellate genus, *Gyrodinium* dominated many sites during the neutral period  
59 (2016). Variations in protistan communities were most strongly correlated with changes in  
60 subthermocline water density. These findings indicate that marine protistan communities in this  
61 region are regimented by deep water mass sources and thus could be profoundly affected by  
62 altered ocean circulation.

63

64

65

66

67

68

69

## 70 **Introduction**

71           The Galápagos Archipelago and surrounding waters (1-2 °S, 90-92 °W) are renowned for  
72 having diverse, highly productive ecosystems. The need to protect their marine ecosystems led to  
73 the establishment of the Galápagos Marine Reserve (GMR) in 1998 (Bensted-Smith, 1998).  
74 Despite greater efforts to conserve and study the GMR, one of the main sources of primary  
75 production, the marine protists, remain largely understudied. Protistan plankton exhibit diverse  
76 trophic modes, ranging from autotrophic phytoplankton to heterotrophic flagellates. A shift in  
77 protist community composition can therefore drastically alter the quantity of food available for  
78 higher trophic levels, and thus influence the overall productivity of the Galápagos marine  
79 ecosystem (De Vargas *et al.*, 2015).

80           The convergence of ocean currents allows waters within the archipelago to have high  
81 primary production relative to the surrounding Eastern Equatorial Pacific (EEP) Ocean, a region  
82 considered high-nutrient, low-chlorophyll. The EEP is a high-nutrient, low chlorophyll region  
83 due to iron limitation (Behrenfeld *et al.*, 1996), which is largely relieved in the GMR when  
84 currents upwell lithogenic nutrients from the Galápagos platform (Barber and Chavez, 1991;  
85 Rafter, Sigman and Mackey, 2017). Three major ocean currents provide the bulk of nutrient  
86 sources to the region (Lindley and Barber, 1998; Fiedler and Talley, 2006). The South Equatorial  
87 Current flows westward, enveloping the equator, and is fed by the Peruvian coastal upwelling  
88 and equatorial upwelling (Pennington *et al.*, 2006) (Figure 1a). The North Equatorial  
89 Countercurrent flows eastward, transporting western Pacific warm pool water to the north of the  
90 South Equatorial Current. The most critical supply of nutrients to the region comes from the  
91 eastward-flowing Equatorial Undercurrent (EUC) which collides subsurface with the western  
92 side of the Galápagos platform. It flows around and through the archipelago below the surface

93 layer (Kessler, 2006) carrying nutrient rich subtropical underwater, and can outcrop west of the  
94 archipelago, making this region a primary productivity hotspot (Chavez and Brusca, 1991;  
95 Sakamoto *et al.*, 1998).

96 Marine protistan communities in the EEP are influenced by El Niño Southern Oscillation  
97 (ENSO), a spatio-temporally complex interannual shift in equatorial Pacific Ocean circulation.  
98 The EEP harbors mostly small-sized phytoplankton communities consisting of *Prochlorococcus*,  
99 *Synechococcus*, and picoeukaryotes (Chavez *et al.*, 1996). However, when equatorial upwelling  
100 is strong it can provide sufficient iron and silica for large-sized phytoplankton such as diatoms to  
101 bloom (Pennington *et al.*, 2006; Masotti *et al.*, 2010; Marchetti *et al.*, 2010). During an El Niño  
102 event, EEP sea surface temperatures (SST) rise above the climatological average causing  
103 stratification. This results in weaker equatorial upwelling, a deeper thermocline, and a slower  
104 EUC. El Niño conditions lead to reduced nitrate availability and decreases in *Synechococcus*,  
105 likely because of their high cellular nitrogen requirement (Moore *et al.*, 2002), which allow small  
106 heterotrophic protists to dominate, altering marine food web dynamics in the EEP (Masotti *et al.*,  
107 2010). Contrary to community dynamics in the EEP, on the west side of the Galápagos  
108 Archipelago, *Synechococcus* and *Prochlorococcus* concentrations decreased during a neutral  
109 period of stronger upwelling following the 2015/16 El Niño (Gifford *et al.*, 2020). Given that  
110 *Prochlorococcus* is speculated to prefer nitrogen sources other than nitrate, it may be more  
111 competitive under stratified El Niño conditions (Moore *et al.*, 2002). There is less understanding  
112 of how shifts in photosynthetic eukaryotes and other protists are influenced by ENSO in the  
113 Galápagos Archipelago specifically, where increased vertical mixing allows for a relatively  
114 higher baseline phytoplankton biomass than the surrounding EEP (Barber *et al.*, 1996).

115           Despite limited knowledge on protistan communities, establishing causes for fluctuations  
116   in phytoplankton biomass in the GMR has been investigated previously (Maxwell, 1975;  
117   Feldman, 1986). Some studies have used satellite chlorophyll *a* (Chl *a*) proxies to understand  
118   phytoplankton biomass variability (Liu *et al.*, 2014; Kislik *et al.*, 2017). Despite seasonal Chl *a*  
119   variability in the GMR, its amplitude varies with basin-scale SST trends, in that Chl *a* peaks in  
120   the Boreal spring, synchronous with the strengthening of the EUC (Palacios, 2004; Sweet *et al.*,  
121   2007). However, this temporal pattern in Chl *a* amplitude does not hold true spatially, as  
122   individual bioregions of the GMR differ (Edgar *et al.*, 2004). The South Equatorial Current and  
123   the North Equatorial Countercurrent meet forming the equatorial front. The seasonal oscillation  
124   of this has been used to predict patterns of Chl *a* concentration (Schaeffer *et al.*, 2008). In the  
125   latter part of the year, the strengthening and tilt of the equatorial front can largely explain Chl *a*  
126   variability (Palacios, 2004).

127           Fewer studies have focused on observing in situ environmental conditions and their  
128   influence on protistan community compositional changes (McCulloch, 2011; Carnicer *et al.*,  
129   2019). These observations are necessary for understanding the ecological implications of El Niño  
130   events in this region. Sporadic surveys of phytoplankton communities provide a historical record  
131   of common diatoms and dinoflagellate species, however they are limited to observations of large,  
132   more “charismatic” species easily identified using light microscopy (Torres, 1998; Torres and  
133   Tapia, 2000, 2002; Tapia and Naranjo, 2012). Some harmful algal species were identified along  
134   with spatial variability in dinoflagellate diversity, which was attributed to changes in deep water  
135   masses to the west of the Galápagos platform (Carnicer *et al.*, 2019). Accessory phytoplankton  
136   pigments have also been used to assess phytoplankton composition in the GMR, such that

137 relative abundances of diatoms and chlorophytes were found to decrease during the 2004/05 El  
138 Niño event, while cyanobacteria and haptophyte proportions increased (McCulloch, 2011).

139 In this study, DNA metabarcoding (i.e., sequencing the 18S rRNA [18S] gene) was used  
140 to examine protistan community composition. Here we show distinct shifts in protist plankton  
141 genera in waters of the Galápagos Archipelago and how they correlate with primary productivity  
142 and oceanographic variables during the 2015/16 ENSO cycle. Because protistan plankton are  
143 important links between oceanographic processes and marine food webs, it is imperative to  
144 understand factors influencing their composition and production with shifts in environmental  
145 conditions attributed to climatic events.

146

## 147 **Methods and materials**

### 148 **Sample collection**

149 Fifteen sites within the GMR (89 – 92 °W, 1.5 °S – 2 °N) were sampled over October 10<sup>th</sup>  
150 to 24<sup>th</sup> of 2015 and October 19<sup>th</sup> to November 11<sup>th</sup> of 2016 (Figure 1a). Based on the Oceanic  
151 Niño Index and the location of the GMR, situated within both the Niño 1.2 region (80 – 90 °W, 0  
152 – 10 °S) and the Niño 3 region (150 – 90 °W, 5 °N – 5 °S), our sampling periods occurred during  
153 El Niño (2015) and neutral conditions (2016) (Santoso, Mcphaden and Cai, 2017). Remote  
154 sensing of sea surface temperatures in the region indicate significantly warmer surface waters  
155 during the sampling period in 2015 relative to 2016 (Figure 1c-d). Using a Seabird SBE 19plus  
156 V2 SeaCAT Profiler, CTD profiles of temperature, salinity and photosynthetically active  
157 radiation (PAR) were collected to ~100 m depth. Ten liter Niskin bottles were used to collect  
158 seawater from the euphotic zone at 50%, 30%, 10%, and 1% incident irradiance ( $I_0$ ) depths to  
159 measure dissolved inorganic nutrients, Chl *a*, dissolved inorganic carbon (DIC) and nitrate

160 (NO<sub>3</sub><sup>-</sup>) uptake rates, and picoplankton cell counts. Seawater was dispensed into acid-cleaned,  
161 seawater rinsed 10 L Cubitainers (Hedwin Corporation, Newark, DE, USA) and subsampled for  
162 measurements. Additional seawater was collected from 50% I<sub>0</sub> to obtain DNA (Figure 1a). Not  
163 all sites yielded DNA concentrations sufficient for sequencing. Processed filters and samples  
164 were frozen at -20 °C until onshore analysis.

165

166

167

168

169

170

171

172

173

174

175

176

177

178

179

180

181

182



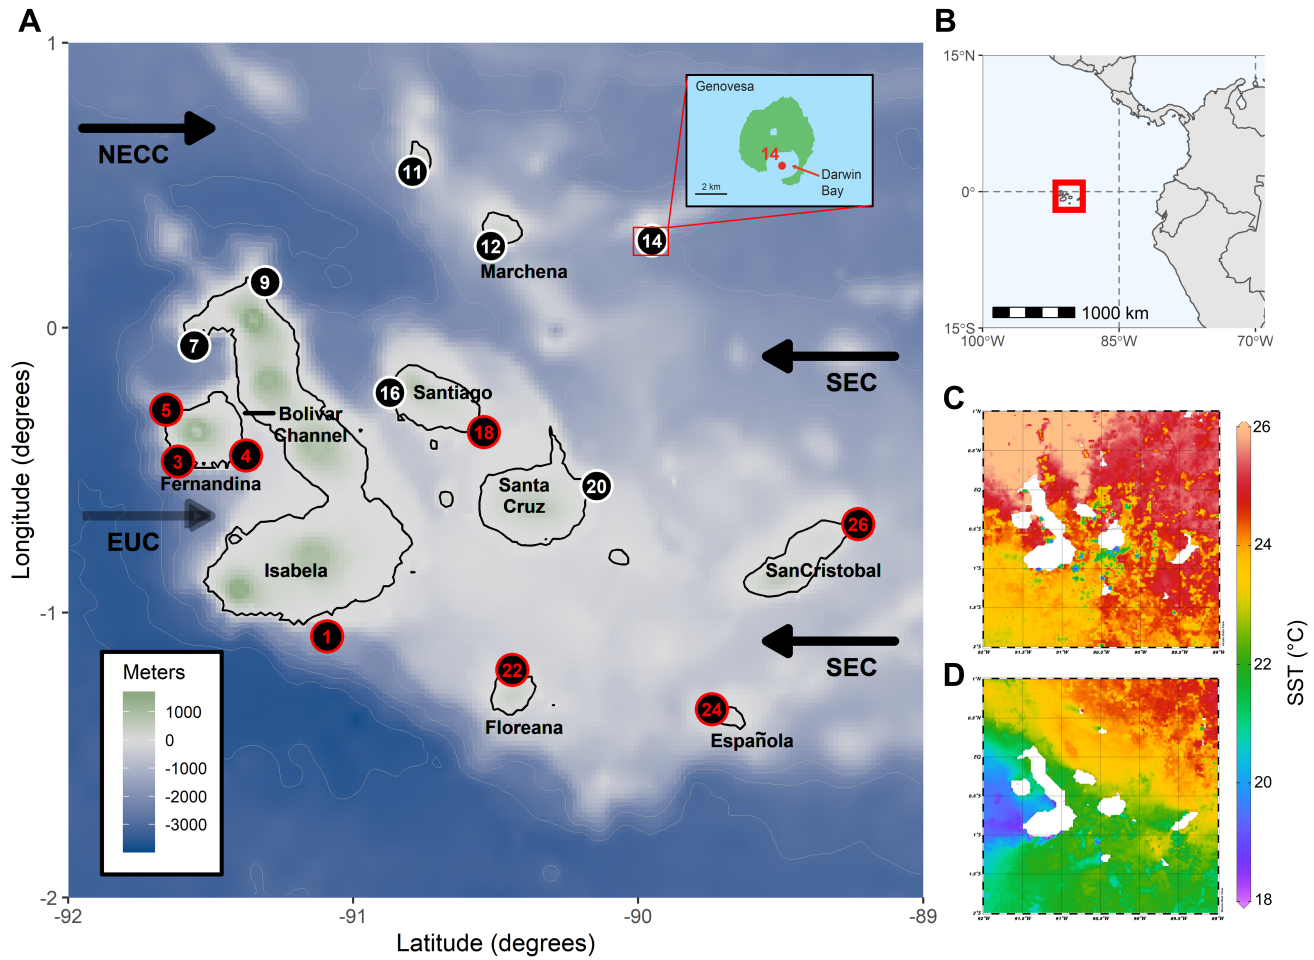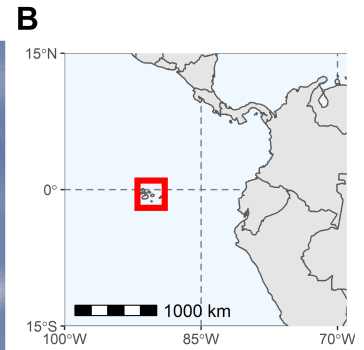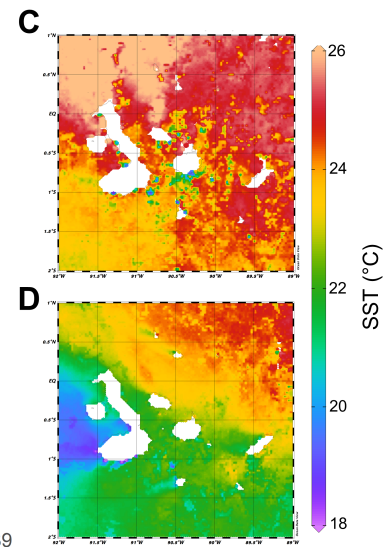

183 **Figure 1.**

184 The Galápagos Archipelago study region. A) Topographic map of the Galápagos Archipelago  
185 and sampling locations. White numbers indicate sites which were sampled for oceanographic  
186 measurements while red numbers indicate sites that were sampled for oceanographic  
187 measurements and protistan community DNA. Currents are abbreviated such that: SEC = South  
188 Equatorial Current, NECC = North Equatorial Countercurrent, and EUC = Equatorial  
189 Undercurrent. Upper right inset shows the location of site 14 near Genovesa Island, a partially  
190 collapsed caldera. B) Map showing the location of the Galápagos Archipelago within the  
191 Eastern Equatorial Pacific. Monthly averaged sea surface temperatures (NOAA AVHRR)  
192 throughout the Galápagos Archipelago for the sampling period in C) October of 2015 and D)  
193 October of 2016.

194

195 **Seawater Properties**

196 Temperature and salinity profiles were used to determine the depths of the mixed and  
197 subthermocline layers. All CTD casts were corrected using SeaBird's SeaSoft software. Potential  
198 density (hereafter referred to as 'density') was calculated using the `sw_pden()` function from the  
199 Mixing Oceanographic toolbox v 1.8.0.0 in MATLAB (R2017b). A consistent density structure  
200 was observed, of a surface and deep layer of almost uniform density, separated by a density  
201 gradient (interfacial layer) that was typically 10s of meters thick. The surface mixed layer depth  
202 was defined as the depth at which the change in density from the surface was  $> 0.35 \text{ kg/m}^3$ . The  
203 subthermocline layer depth (the top of the deep layer of uniform density) was determined by  
204 calculating the depth at which change in density from the bottom of the cast was  $> 0.2 \text{ kg/m}^3$ .  
205 The casts were visually inspected to ensure that the density cut-off values defined the layers

206 appropriately. Temperature, salinity, and density of the mixed and subthermocline layers were  
207 averaged from CTD cast measurements. Methods for measuring dissolved inorganic nutrients are  
208 described in the supplemental material.

### 209 **Phytoplankton Biomass and Productivity**

210 Phytoplankton biomass was approximated by measuring size-fractionated (<5  $\mu\text{m}$  and >5  
211  $\mu\text{m}$ ) Chl *a* concentrations using the acetone extraction method (Sartory and Grobbelaar, 1984).  
212 Picophytoplankton cells, specifically *Prochlorococcus*, *Synechococcus*, and picoeukaryote  
213 populations were enumerated using flow cytometry (Johnson *et al.*, 2010). Size-fractionated  
214 DIC (i.e. primary productivity) and  $\text{NO}_3^-$  uptake rates were measured from 24 hr incubations  
215 using stable isotope tracer techniques (Dugdale and Goering, 1967; Hama *et al.*, 1983).  
216 Additional methods describing Chl *a*, flow cytometry, primary productivity and  $\text{NO}_3^-$  uptake  
217 measurements are provided in the supplemental material.

### 218 **DNA sequencing and Bioinformatics**

219 Protistan taxonomic identification and proportions were obtained through sequencing the  
220 V4 region of the 18S rRNA gene. DNA collection and amplicon library preparation are  
221 described in the supplemental material. Approximately four million paired-end reads were  
222 obtained using the Illumina MiSeq sequencing platform across two lanes. Mean amplicon length  
223 for sequencing lane one was 561 bp, while mean amplicon length for sequencing lane two was  
224 599 bp. Sequence files were demultiplexed. QIIME 2 v.2018.6 software was used for processing  
225 the raw reads into assembled amplicons. The QIIME 2 plug-in, DADA2 was used for denoising  
226 such that reverse and forward reads were truncated to 250 base pairs (bp) and 210 bp, and 260 bp  
227 and 280 bp, for sequencing lanes one and two respectively. Chimeras were removed by the  
228 consensus method and reads were merged (Supplementary Table 1) using default scripts

229 provided in the QIIME 2 documentation (docs.qiime2.org). Assembled amplicons were  
230 annotated by a BLAST search against the SILVA v. 123 reference database using a 90%  
231 pairwise identity cutoff. Metazoans were removed. Using the R package phyloseq v. 1.24.2, the  
232 samples were rarefied to 2066 reads per site (Supplementary Figure 1).

233 Annotations which were unknown in the highest taxonomic ranks (Kingdom, Phylum,  
234 Class, Order) were removed, under the assumption that it was unlikely to sample a novel high  
235 taxonomic rank of plankton. Custom taxonomy was assigned to the Class taxonomic rank based  
236 on the top seven relatively abundant groupings (Supplementary Table 2). Any annotation that did  
237 not belong to the top seven groups was annotated as “Other”. Unknown or uncultured  
238 annotations in the lowest three taxonomic ranks (Family, Genus, Species) were grouped into the  
239 “Other” category within their respective Class ranks. Additionally, where possible, the top seven  
240 genera were maintained while the rest were also annotated as “Other” (there were only six  
241 known genera in the Chlorophyta). This resulted in 120 genera, prior to grouping unknown and  
242 uncultured OTUs (Supplementary table 2). All raw sequences have been deposited in the NCBI  
243 SRA database (Accession No. PRJNA689599).

#### 244 **Statistical Analyses**

245 Analysis of water properties, phytoplankton biomass, productivity, and 18S data was  
246 performed using the vegan package (v. 2.5-4) in R version 3.6.2. Summary statistics and Mann-  
247 Whitney-Wilcoxon tests were used to test for differences in dissolved nutrients, Chl *a*, primary  
248 productivity and NO<sub>3</sub><sup>-</sup> uptake rates between the two sampling years (Supplementary Table 3).  
249 The 18S data was arranged in an OTU table and transformed to relative proportions at the genus  
250 level, from which Bray-Curtis dissimilarity distances were calculated using the vegdist()  
251 function. All other variables (i.e., physical water properties, phytoplankton biomass, primary

252 productivity and  $\text{NO}_3^-$  uptake rates) were similarly transformed to Euclidean distances. A  
253 correlation matrix was used to assess which variables were relatively redundant (Supplementary  
254 Figure 2). These variables were removed for the BIO-ENV ('biota-environment') analysis. The  
255 `bioenv()` function was used to find the best subset of variables which had the maximum rank  
256 correlation with the community Bray-Curtis dissimilarities (Clarke and Ainsworth, 1993). These  
257 variable subsets were identified for the entire protistan community and for the following  
258 subgroups of the community: dinoflagellates, chlorophytes, and diatoms. A Non-metric Multi-  
259 Dimensional Scaling (NMDS) plot was made from the Bray Curtis community dissimilarity  
260 distances. The `envfit()` function was then used to fit the best subsets of variables onto the  
261 community dissimilarity ordinations (Supplementary Table 4).

262

## 263 **Results and Discussion**

### 264 **Physical seawater properties**

265 Differences in upper ocean physical seawater properties between the El Niño (2015) and  
266 neutral (2016) years were apparent (Figure 2, Supplementary Table 5). At most sites, mixed  
267 layer depths were deeper in 2015 than 2016 (Fig. 2a). The mixed layer temperature range was  
268 warmer in 2015 (22.9-26.4 °C) relative to 2016 (17.1-23.7 °C), with a mean difference of 3.8°C  
269 (Figure 2b). Mixed layer salinities varied by an average of 0.23 PSU, with most being higher in  
270 2015 (Figure 2c). As a result, the mean density in 2016 was higher by 0.99 kg/m<sup>3</sup> during the  
271 neutral period (Figure 2d). These differences in densities also existed spatially, such that the sites  
272 located west of Isabela Island (Sites 3-7) had the highest mixed layer density values in 2016  
273 (Figure 2d). Similar interannual density trends were observed in the subthermocline layer, where  
274 subthermocline depths at most sites were deeper in 2015 than 2016 (Fig. 2e). The subthermocline

275 layer was on average 3.2 °C cooler and 0.07 PSU fresher in 2016 resulting in seawater which was  
276 on average 0.70 kg/m<sup>3</sup> denser relative to the El Niño (Fig. 2f-h). One notable exception was site  
277 14 located near Genovesa Island, inside a partially submerged caldera (see inset map in Fig. 1a).  
278 The caldera is isolated from surrounding ocean by an approximately 10 m deep sill, restricting  
279 exchange with waters outside the caldera and allowing seawater properties within the caldera to  
280 remain more constant between years. Aside from this site outlier, subthermocline layer densities  
281 showed consistent temporal change relative to the mixed layer, which was more spatially  
282 sensitive.

283

284

285

286

287

288

289

290

291

292

293

294

295

296

297

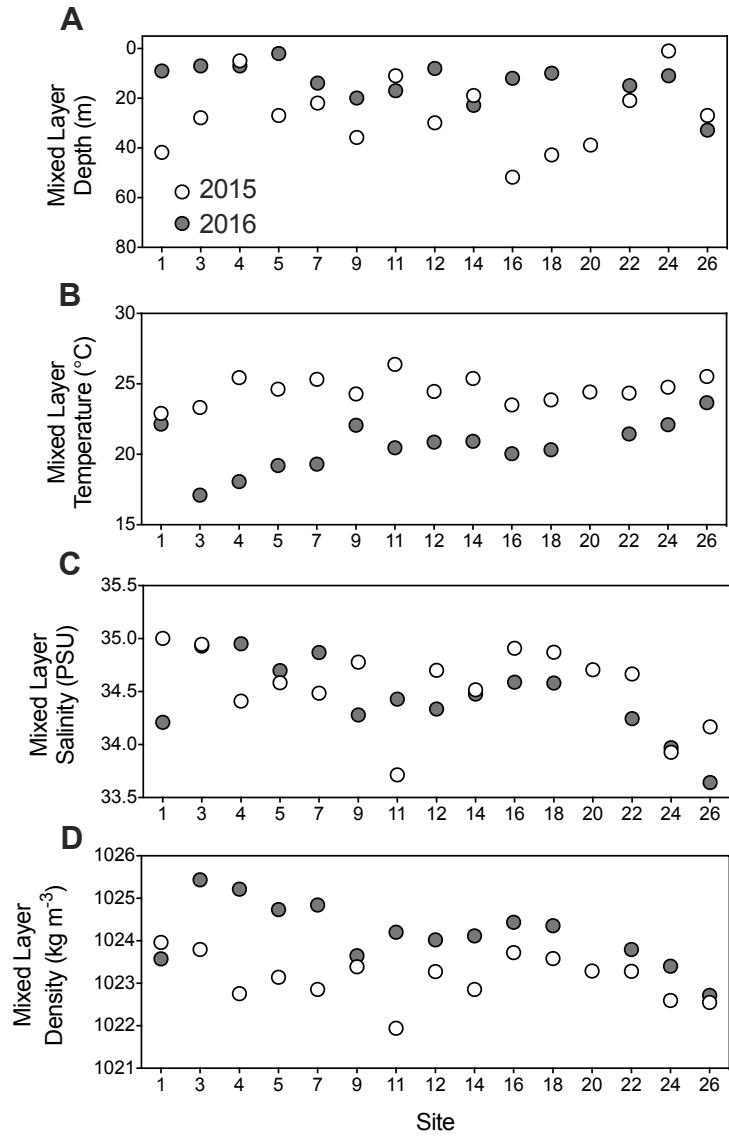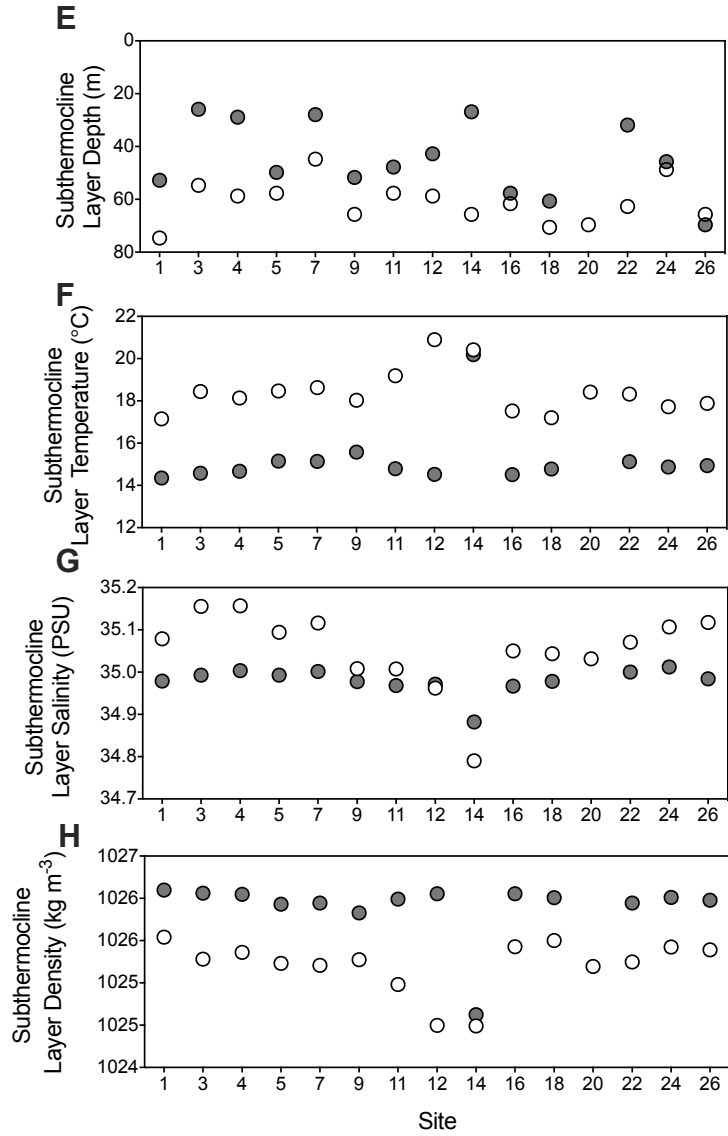

298 **Figure 2.**

299 Physical seawater properties during the 2015 and 2016 sampling period. A) Mixed layer depths,  
300 B) mixed layer temperatures, C) mixed layer salinities, D) mixed layer densities, E)  
301 subthermocline layer depths, F) subthermocline layer temperatures, G) subthermocline layer  
302 salinities and H) subthermocline layer densities.

303

304 The differences in water mass densities between the years were reflected in dissolved  
305 nutrient concentrations. Nitrate and silicic acid ( $\text{Si}(\text{OH})_4$ ) concentrations within the mixed layer  
306 were lower at nearly all sites in 2015 relative to 2016 (Fig. 3a and b). Nitrate concentration in  
307 the euphotic zone was significantly lower during the El Niño relative to 2016, with median  
308 values of  $1.70 \mu\text{mol L}^{-1}$  and  $6.20 \mu\text{mol L}^{-1}$  respectively (Fig. 3c). Similarly,  $\text{Si}(\text{OH})_4$  had lower  
309 median values in 2015 ( $1.65 \mu\text{mol L}^{-1}$ ) compared to 2016 ( $4.99 \mu\text{mol L}^{-1}$ ) (Fig. 3d). Both years  
310 had higher  $\text{NO}_3^-$  concentrations relative to  $\text{Si}(\text{OH})_4$  concentrations, however the  $\text{Si}(\text{OH})_4$ :  $\text{NO}_3^-$   
311 slope of the distribution in 2015 was lower ( $m = 0.40$ ) than in 2016 ( $m = 0.69$ ), indicating that  
312 the concentration of  $\text{Si}(\text{OH})_4$  relative to  $\text{NO}_3^-$  was lower during the El Niño (Figure 3e). Overall,  
313 physical seawater properties and nutrient concentrations in the GMR show strong temporal  
314 trends indicative of oceanographic variation during the 2015/16 El Niño event.

315

316

317

318

319

320



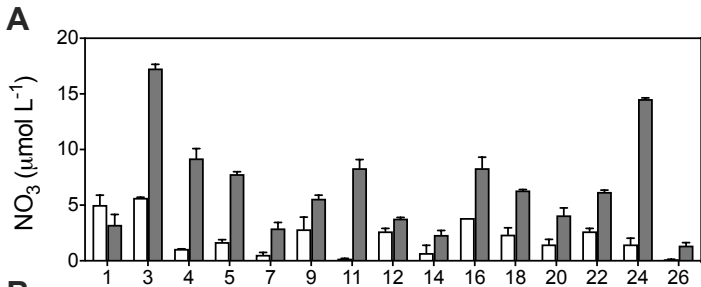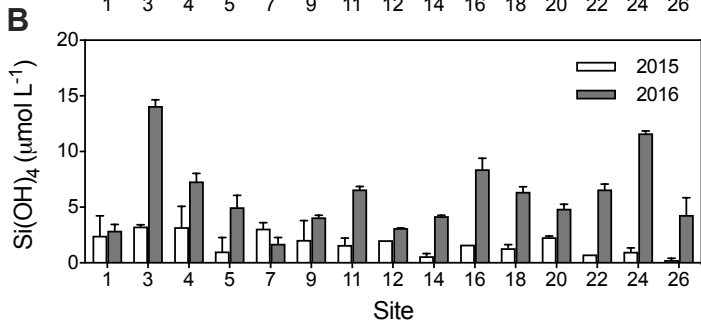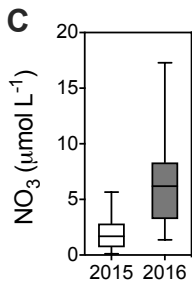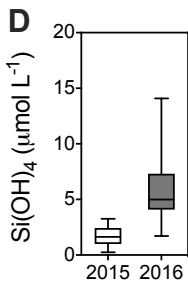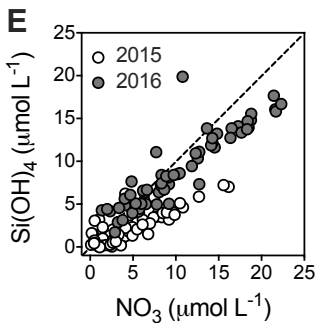

321 **Figure 3.**

322 Dissolved inorganic nutrients during the 2015 and 2016 sampling period. A) Nitrate ( $\text{NO}_3^-$ )  
323 concentrations. B) silicic acid ( $\text{Si}(\text{OH})_4$ ) concentrations. C) interquartile range of  $\text{NO}_3^-$   
324 concentrations at 50% incident irradiance. D) interquartile range of  $\text{Si}(\text{OH})_4$   
325 concentrations at 50% incident irradiance. E) Scatter plot of  $\text{NO}_3^-$  verses  $\text{Si}(\text{OH})_4$  concentrations  
326 collected at depths (50%, 30%, 10%, 1% incident irradiance) throughout the euphotic zone. The  
327 dashed line represents the 1:1 line. Error bars indicate the standard deviation of the mean ( $n=2$ ).

328

329 **Phytoplankton biomass and primary productivity**

330 Chl *a* concentrations were higher in 2016 at most sites with the primary exceptions of  
331 sites 14, and 16 (Fig. 4a). The median concentration of the small-size fraction ( $< 5 \mu\text{m}$ ) was  
332 similar between 2015 ( $0.22 \mu\text{g L}^{-1}$ ) and 2016 ( $0.23 \mu\text{g L}^{-1}$ ) (Fig. 4b). The large-size fraction ( $> 5$   
333  $\mu\text{m}$ ) had a higher median in 2016 ( $0.2 \mu\text{g L}^{-1}$ ) relative to 2015 ( $0.13 \mu\text{g L}^{-1}$ ) with a maximum  
334 concentration of  $1.43 \mu\text{g L}^{-1}$  in 2016 (Fig. 4c). These are comparable to measurements (89 – 92  
335 °W, 2 °S – 1°N) observed previously during a neutral period, where the average surface Chl *a*  
336 was  $0.25 \mu\text{g L}^{-1}$  and the highest concentration ( $0.53 \mu\text{g L}^{-1}$ ) was recorded west of Isabela island  
337 (Torres and Tapia, 2000). In our study, the average small and large size-fractions of Chl *a* did not  
338 significantly differ between years, however the large size-fraction showed stronger temporal  
339 ( $p=0.06$ ) and spatial trends, having higher concentrations in 2016 at sites located west of Isabela  
340 Island (Fig. 4a and 4d).

341 *Synechococcus* flow cytometry cell counts were higher at western sites 3-7 in 2015 than  
342 2016 (Supplementary Figure 3), similar to observations made at the same sites quantified using  
343 metagenomics (Gifford *et al.*, 2020). Site four had the greatest difference between the years,

344 having a concentration of  $2.4 \times 10^5$  cells  $\text{mL}^{-1}$  in 2015 and  $5.9 \times 10^4$  cells  $\text{mL}^{-1}$  in 2016. The  
345 highest *Synechococcus* concentration ( $2.6 \times 10^5$  cells  $\text{mL}^{-1}$ ) was recorded in 2015 at site 14, within  
346 the isolated caldera. *Prochlorococcus* was generally more abundant in 2015, particularly in the  
347 central and eastern sites, and ranged in concentration from  $6.2 \times 10^3$  cells  $\text{mL}^{-1}$  to  $1.9 \times 10^5$  cells  
348  $\text{mL}^{-1}$  (Supplementary Figure 3). In 2016 *Prochlorococcus* concentrations were generally lower,  
349 ranging from  $3.8 \times 10^3$  cells  $\text{mL}^{-1}$  to  $1.6 \times 10^4$  cells  $\text{mL}^{-1}$  except at sites five and seven where they  
350 were an order of magnitude lower. Picoeukaryotes typically ranged from  $10^3$ - $10^4$  cells  $\text{mL}^{-1}$  and  
351 had more complex abundance patterns between years than *Synechococcus* and *Prochlorococcus*  
352 (Supplementary Figure 3). For example, there were higher concentrations of picoeukaryotes at  
353 western sites 4-7 in 2015, while lower concentrations relative to 2016 were recorded at sites 20-  
354 26.

355 Total DIC uptake rates (primary productivity) remained commensurate between years but  
356 showed spatial variability, such that sites 3-12 and 18-22 increased during 2016 while other sites  
357 decreased (Figure 4e). Insignificant temporal trends in total primary productivity could be  
358 attributed to opposite trends in the phytoplankton size-fractions. For instance, median DIC  
359 uptake rates in the large size-fraction were  $0.46 \mu\text{mol C L d}^{-1}$  in 2015 to  $1.2 \mu\text{mol C L d}^{-1}$  in  
360 2016, while the small cells decreased from having a median of  $1.9 \mu\text{mol C L d}^{-1}$  in 2015 to  $1.44$   
361  $\mu\text{mol C L d}^{-1}$  in 2016 (Figure 4g).  $\text{NO}_3^-$  uptake rates displayed trends similar to Chl *a* and  
362 primary productivity such that the large size-fraction differed more between years than the small  
363 size-fraction ( $p=0.07$ ;  $p=0.87$ ) (Figure 4f and h). The decrease in biomass of the large size-  
364 fraction in 2015 coincided with a lower median  $\text{NO}_3^-$  uptake rate ( $51.9 \text{ nmol N L d}^{-1}$ ) in the large  
365 size-fraction compared to the small size-fraction ( $81.4 \text{ nmol N L d}^{-1}$ ) (Figure 4h). Overall median

366 rates of  $\text{NO}_3^-$  uptake were greater in both size-fractions during 2016 (129.8, 131.6  $\text{nmol N L d}^{-1}$ ;  
367 small and large size-fractions, respectively) (Figure 4h).

368

369

370

371

372

373

374

375

376

377

378

379

380

381

382

383

384

385

386

387

388

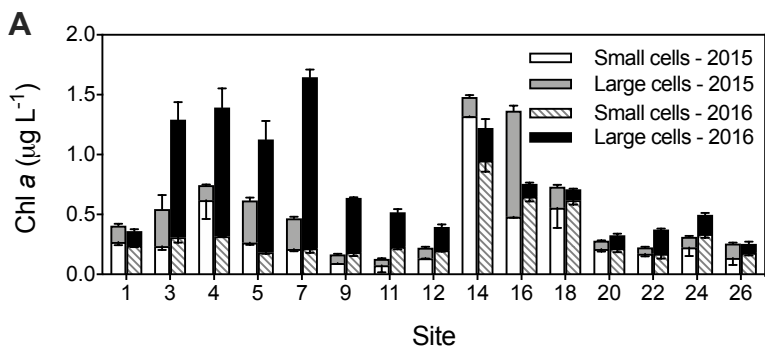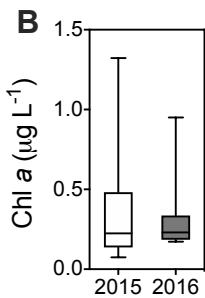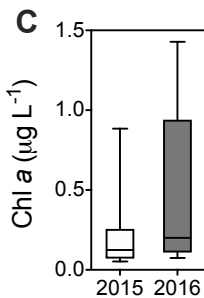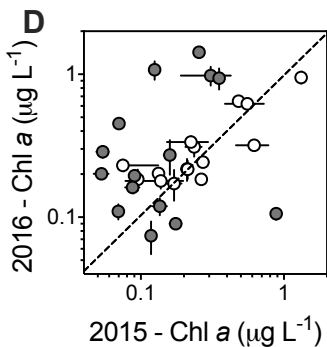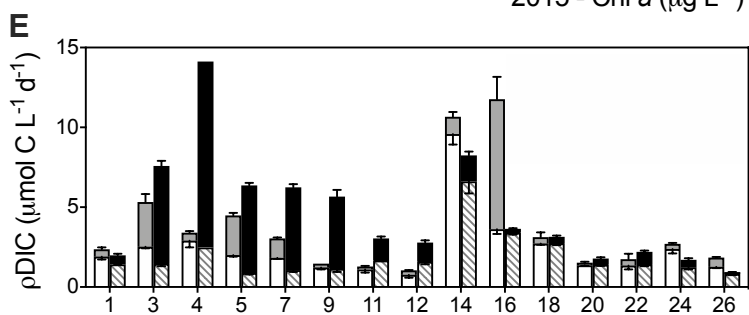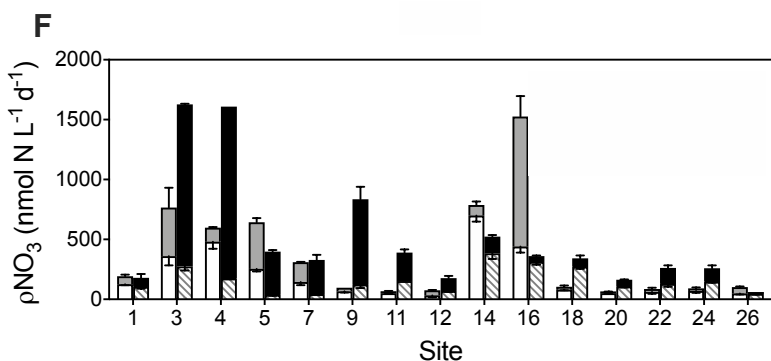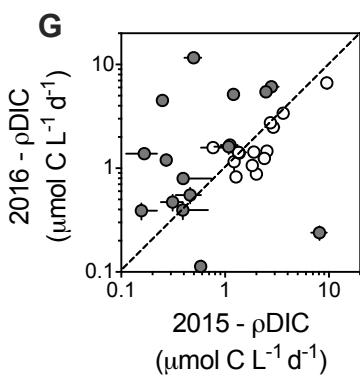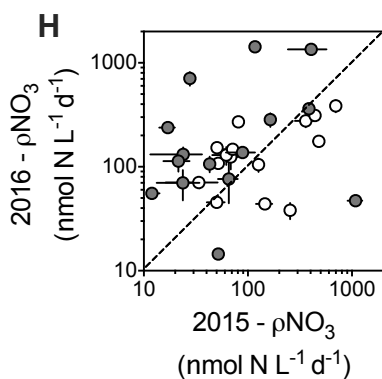

389 **Figure 4.**

390 Phytoplankton biomass and primary productivity at 50% incident irradiance during the 2015 and  
391 2016 sampling period. A) Size-fractionated chlorophyll *a* (Chl *a*) concentrations. Chl *a* is  
392 distinguished between large (> 5  $\mu\text{m}$ ) and small (<5  $\mu\text{m}$ ) size-fractions. B) interquartile range of  
393 Chl *a* concentrations in small cells across all sites and C) interquartile range of Chl *a*  
394 concentrations in large cells across all sites. D) Scatter plot of large (grey) and small (white) cell  
395 Chl *a* concentrations in 2016 versus 2015. Size-fractionated E) dissolved inorganic carbon  
396 uptake rates (i.e. primary productivity;  $\rho\text{DIC}$ ) and F)  $\text{NO}_3^-$  uptake rates ( $\rho\text{NO}_3^-$ ). Bar colors are  
397 the same as in A. Scatter plot of size-fractionated G)  $\rho\text{DIC}$  and H)  $\rho\text{NO}_3^-$  in 2016 versus 2015.  
398 The dashed lines represent the 1:1 line. Symbol colors are the same as in D. Error bars indicate  
399 the standard deviation of the mean ( $n=3$ ). In A, E and F, error bars for the small size-fraction are  
400 in the downward direction whereas error bars for the large size-fraction are in the upward  
401 direction.

402

403 **Shifts in protistan community composition**

404 The most proportionally dominant protist groups in the GMR included the dinoflagellates  
405 (part of the Alveolata group), chlorophytes, diatoms (part of the Stramenopiles group), Hacrobia,  
406 Opisthokont fungi, and Rhizaria (Figure 5a). Collectively, dinoflagellates, chlorophytes, and  
407 diatoms dominated the protistan communities and exhibited the most variability between years  
408 (Figure 5b-d). Other groups had high spatial variability across sites. For instance, the ciliates and  
409 rhizarians were detected at every site in 2015 but lacked detection or genus level identification at  
410 over half of the sites in 2016 (Supplemental Fig. 3). Thus, analyses were focused on changes in  
411 the three most dominant groups.

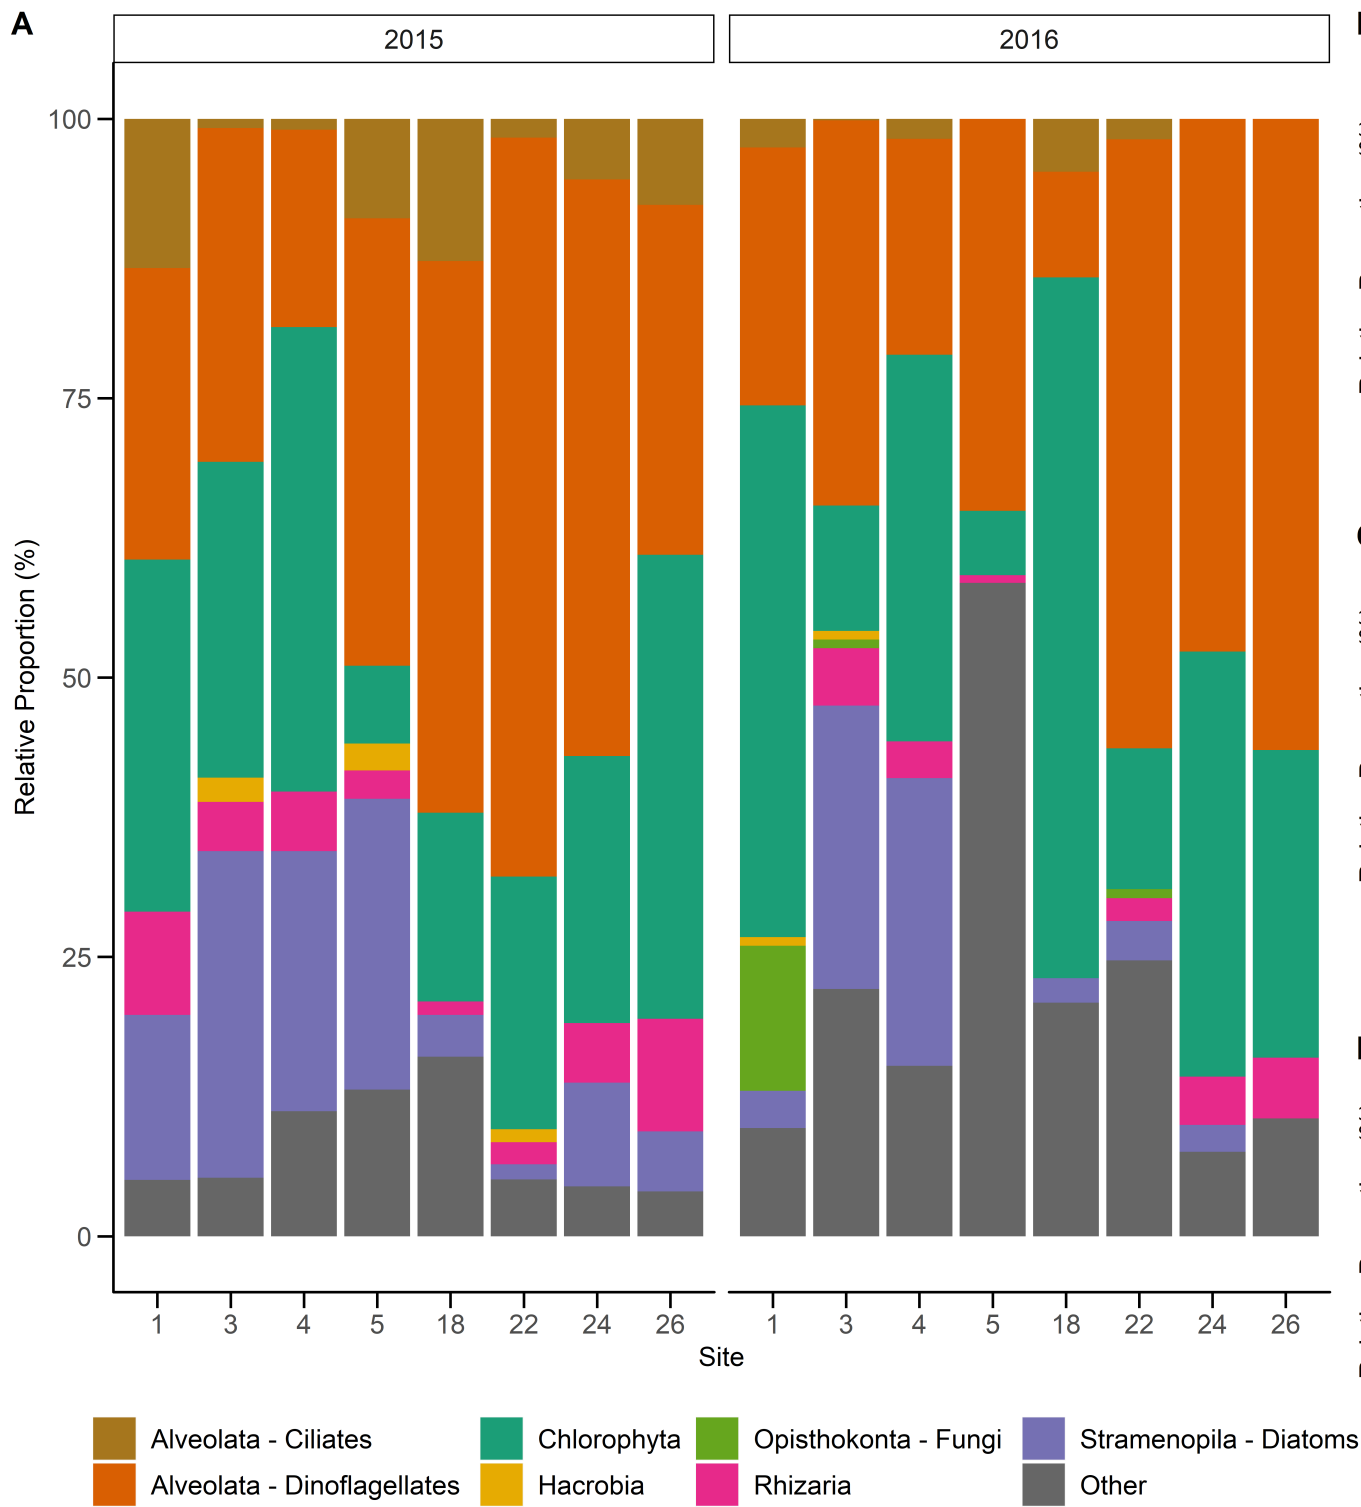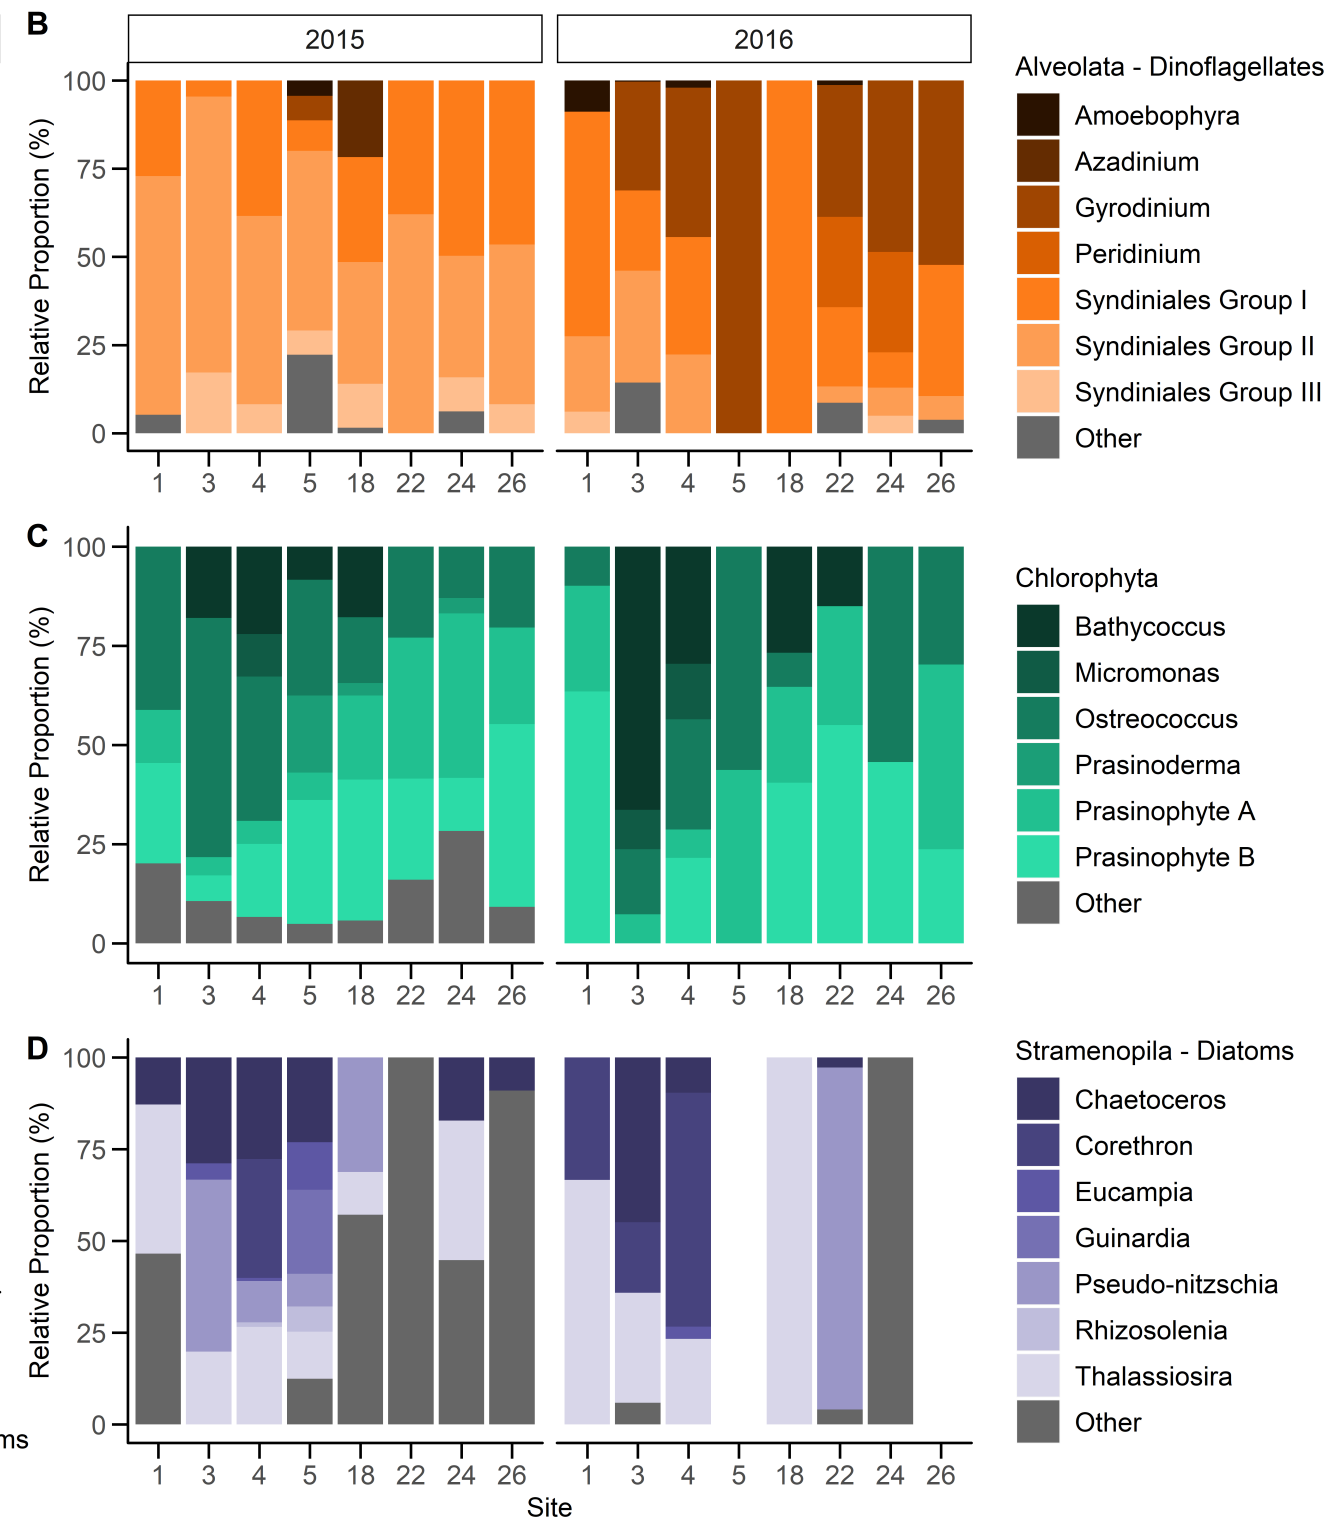

412 **Figure 5.**

413 Protistan community composition based on 18S rRNA gene amplicons. A) Relative proportions  
414 of protists at class level groupings in 2015 and 2016. B) Relative proportions of the  
415 Dinoflagellate group, highlighting the top seven most abundant genera. C) Relative proportions  
416 of the Chlorophyta group, highlighting the top six most abundant genera. D) Relative proportions  
417 of the Diatom group, highlighting the top seven most abundant genera.

418

419 The dinoflagellates had a total of 186 OTUs within 21 genera. Dinoflagellate  
420 communities were proportionally well represented by seven primary order and genus level  
421 groups (Figure 5b). Temporal changes in dinoflagellate proportions between years were more  
422 prominent than spatial changes among sites, as indicated by a larger variation along the  
423 horizontal axis of the NMDS plot (Figure 6). Changes in dinoflagellate community structure  
424 most resembled the collective changes in the density of the subthermocline layer, primary  
425 productivity by small cells, and picoeukaryote cell abundance (Spearman's  $\rho = 0.61$ ) (Table 1).  
426 Dinoflagellate composition changed the most between years relative to the chlorophytes and  
427 diatoms, yet as a broader group they maintained relatively high proportions over the 2015/16  
428 ENSO. This could be due in part to the diverse life strategies that enable dinoflagellates to bloom  
429 at various phases of the upwelling cycle (Smayda and Trainer, 2010).

430

431

432

433

434



435 **Table 1.**

436 Combinations of variables yielding the ‘best matches’ of variable (Euclidian) and community  
 437 (Bray Curtis dissimilarity) matrices using Spearman’s rank correlation ( $\rho$ ). The variables are  
 438 abbreviated such that: lg\_updic = dissolved inorganic carbon uptake by the large (>5  $\mu\text{m}$ )  
 439 phytoplankton size-fraction; pden\_dl = potential density of the subthermocline layer; phosphate  
 440 = phosphate concentration; pico = picoeukaryote flow-cytometry counts; pro = *Prochlorococcus*  
 441 flow-cytometry counts; sil = silicic acid concentration; sm\_updic = dissolved inorganic carbon  
 442 uptake by the small (<5  $\mu\text{m}$ ) phytoplankton size-fraction; sm\_upnit = nitrate uptake by the small  
 443 (<5  $\mu\text{m}$ ) phytoplankton size-fraction; syn = *Synechococcus* flow-cytometry counts; temp\_ml =  
 444 temperature of the mixed layer; tot\_upnit = total nitrate uptake of both large and small  
 445 phytoplankton size-fractions. (a) Whole protist community (b) Dinoflagellates (c) Chlorophytes  
 446 (d) Diatoms

|                           | <b>Environmental &amp; Ecological Variables</b>                         | <b>Variables</b> | <b>Spearman's<br/>Rho</b> |
|---------------------------|-------------------------------------------------------------------------|------------------|---------------------------|
| <b>A. Whole Community</b> |                                                                         |                  |                           |
|                           | tot_upnit, pico, pro, pden_dl                                           | 4                | 0.6239                    |
|                           | tot_upnit, pico, pden_dl                                                | 3                | 0.6216                    |
|                           | tot_upnit, syn, pico, pro, pden_dl                                      | 5                | 0.6189                    |
|                           | tot_upnit, sm_updic, syn, pico, pro, pden_dl                            | 6                | 0.6179                    |
|                           | sil, tot_upnit, sm_updic, syn, pico, pro, pden_dl                       | 7                | 0.6099                    |
|                           | sil, sm_upnit, tot_upnit, sm_updic, syn, pico, pro, pden_dl             | 8                | 0.6057                    |
|                           | sil, sm_upnit, tot_upnit, sm_updic, syn, pico, pro,<br>pden_dl, temp_ml | 9                | 0.5898                    |

|                           |                                                                                              |    |        |
|---------------------------|----------------------------------------------------------------------------------------------|----|--------|
|                           | sil, sm_upnit, tot_upnit, sm_updic, lg_updic, syn, pico,<br>pro, pden_dl, temp_ml            | 10 | 0.5676 |
|                           | syn, pden_dl                                                                                 | 2  | 0.5664 |
|                           | phosphate, sil, sm_upnit, tot_upnit, sm_updic, lg_updic,<br>syn, pico, pro, pden_dl, temp_ml | 11 | 0.5498 |
|                           | pden_dl                                                                                      | 1  | 0.3681 |
| <b>B. Dinoflagellates</b> |                                                                                              |    |        |
|                           | sm_updic, pico, pden_dl                                                                      | 3  | 0.6063 |
|                           | sm_updic, pico, pro, pden_dl                                                                 | 4  | 0.5951 |
|                           | pico, pden_dl                                                                                | 2  | 0.566  |
|                           | sil, sm_updic, syn, pico, pden_dl                                                            | 5  | 0.5649 |
|                           | sil, sm_updic, syn, pico, pro, pden_dl                                                       | 6  | 0.5495 |
|                           | sil, sm_updic, syn, pico, pro, pden_dl, temp_ml                                              | 7  | 0.5183 |
|                           | phosphate, sil, sm_updic, syn, pico, pro, pden_dl,<br>temp_ml                                | 8  | 0.4965 |
|                           | phosphate, sil, sm_updic, lg_updic, syn, pico, pro,<br>pden_dl, temp_ml                      | 9  | 0.4748 |
|                           | phosphate, sil, sm_upnit, sm_updic, lg_updic, syn, pico,<br>pro, pden_dl, temp_ml            | 10 | 0.4493 |
|                           | pden_dl                                                                                      | 1  | 0.4222 |
|                           | phosphate, sil, sm_upnit, tot_upnit, sm_updic, lg_updic,<br>syn, pico, pro, pden_dl, temp_ml | 11 | 0.4143 |
| <b>C. Chlorophytes</b>    |                                                                                              |    |        |
|                           | tot_upnit, pico                                                                              | 2  | 0.6826 |
|                           | sm_upnit, syn, pico                                                                          | 3  | 0.6756 |

|                   |                                                                                              |    |        |
|-------------------|----------------------------------------------------------------------------------------------|----|--------|
|                   | sm_upnit, syn, pico, pden_dl                                                                 | 4  | 0.6739 |
|                   | sm_upnit, tot_upnit, syn, pico, pden_dl                                                      | 5  | 0.6733 |
|                   | sm_upnit, tot_upnit, syn, pico, pro, pden_dl                                                 | 6  | 0.6621 |
|                   | sm_upnit, tot_upnit, lg_updic, syn, pico, pro, pden_dl                                       | 7  | 0.6315 |
|                   | sm_upnit, tot_upnit, lg_updic, syn, pico, pro, pden_dl,<br>temp_ml                           | 8  | 0.5947 |
|                   | pico                                                                                         | 1  | 0.5861 |
|                   | phosphate, sm_upnit, tot_upnit, lg_updic, syn, pico, pro,<br>pden_dl, temp_ml                | 9  | 0.5655 |
|                   | phosphate, sm_upnit, tot_upnit, sm_updic, lg_updic, syn,<br>pico, pro, pden_dl, temp_ml      | 10 | 0.5381 |
|                   | phosphate, sil, sm_upnit, tot_upnit, sm_updic, lg_updic,<br>syn, pico, pro, pden_dl, temp_ml | 11 | 0.4993 |
| <b>D. Diatoms</b> |                                                                                              |    |        |
|                   | sm_updic, pro                                                                                | 2  | 0.3671 |
|                   | sil, sm_updic, pro                                                                           | 3  | 0.3585 |
|                   | sm_updic                                                                                     | 1  | 0.3353 |
|                   | sil, tot_upnit, sm_updic, pro                                                                | 4  | 0.3312 |
|                   | sil, sm_upnit, tot_upnit, sm_updic, pro                                                      | 5  | 0.2969 |
|                   | sil, sm_upnit, tot_upnit, sm_updic, pro, pden_dl                                             | 6  | 0.2788 |
|                   | sil, sm_upnit, tot_upnit, sm_updic, pico, pro, pden_dl                                       | 7  | 0.2554 |
|                   | sil, sm_upnit, tot_upnit, sm_updic, lg_updic, pico, pro,<br>pden_dl                          | 8  | 0.2341 |
|                   | sil, sm_upnit, tot_upnit, sm_updic, lg_updic, syn, pico,<br>pro, pden_dl                     | 9  | 0.2017 |

|  |                                                                                              |    |        |
|--|----------------------------------------------------------------------------------------------|----|--------|
|  | phosphate, sil, sm_upnit, tot_upnit, sm_updic, lg_updic,<br>syn, pico, pro, pden_dl          | 10 | 0.1726 |
|  | phosphate, sil, sm_upnit, tot_upnit, sm_updic, lg_updic,<br>syn, pico, pro, pden_dl, temp_ml | 11 | 0.1444 |

447

448

449

450

451

452

453

454

455

456

457

458

459

460

461

462

463

464

465

466

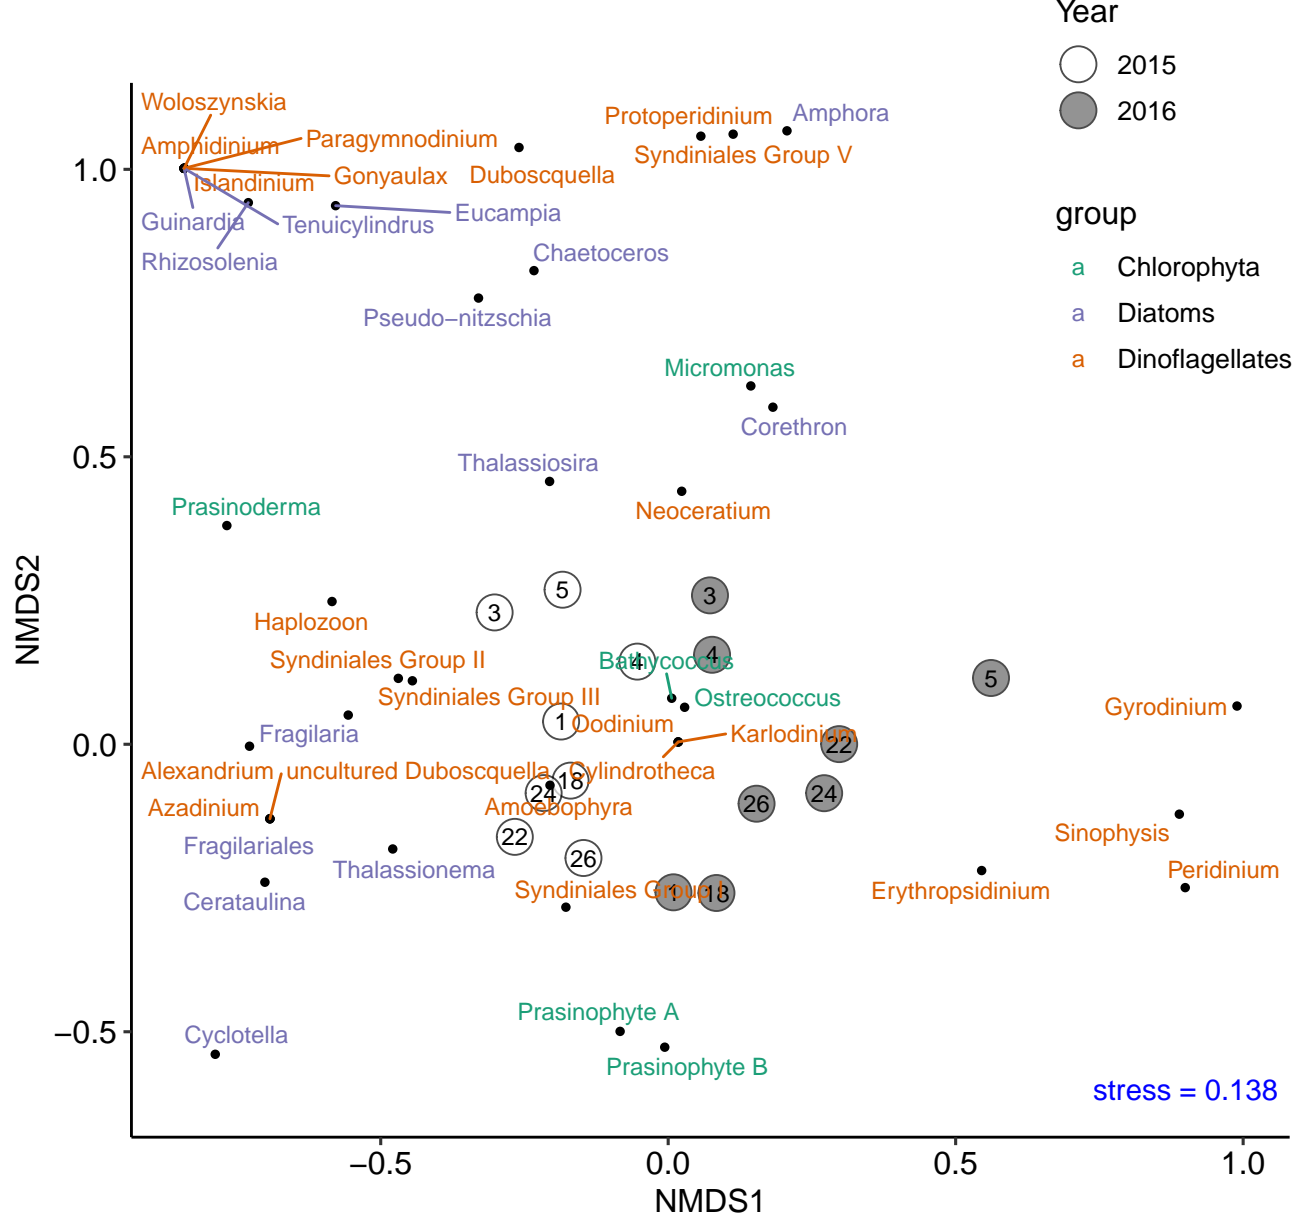

467 **Figure 6.**

468 Non-metric Multi-Dimensional Scaling (NMDS) plot showing differences in the whole protistan  
469 community composition based on the Bray-Curtis dissimilarity matrix. 2015 sites (white) and  
470 2016 sites (grey) are labelled with site numbers. The loadings for each genera group are plotted  
471 as points (black).

472

473 Members of the dinoflagellate genus *Gyrodinium* showed the strongest temporal shift,  
474 seeming to favor the relatively cooler, higher nutrient conditions present in 2016 such that they  
475 were notably represented in the west (sites 3-5) and east (sites 22-26) (Figure 4e). Some  
476 *Gyrodinium* species have been found in sediments, and are suspected to form benthic resting  
477 cysts which live on internal nutrient reserves for long periods of dormancy until conditions  
478 become more favorable for growth (Shang *et al.*, 2019). Along the coasts of Santa Cruz and  
479 other small neighboring islands in the central region of the GMR, water column surveys of  
480 dinoflagellate communities found that 84% of samples contained benthic epiphytic  
481 dinoflagellates (Carnicer *et al.*, 2019), a high percentage given that only ~10% of dinoflagellates  
482 associate with a substrate (Hoppenrath *et al.*, no date). The suspension of these epiphytic  
483 dinoflagellates in the GMR suggests potential physical mechanisms for benthic resting cyst  
484 resuspension. Other cyst forming genera which were detected in our samples include  
485 *Alexandrium*, *Gonyaulax*, *Neoceratium*, *Paragymnodinium*, *Peridinium*, *Proto-peridinium*, and  
486 *Woloszynskia* (Pospelova and Head, 2002; Bravo and Figueroa, 2014; Yokouchi, Onuma and  
487 Horiguchi, 2018). *Peridinium* was also detected in 2016 at sites 22 and 24, where it made up a  
488 significant proportion of the dinoflagellate community (Figure 5b). Long-term nutrient and  
489 temperature stress are the most common causes of resting cyst formation in dinoflagellates

490 (Bravo and Figueroa, 2014). For example, *Gyrodinium uncatenum*, now renamed *Levanderina*  
491 *fissa*, forms cysts to survive in a dormant resting stage which can last for a duration of months to  
492 decades (Anderson, Coats and Tyler, 1985). This and other direct observations of cyst formation  
493 in closely related species, suggest that the *Gyrodinium* genus have the ability to survive long-  
494 term environmental stress (Bravo and Figueroa, 2014; Shang *et al.*, 2019). Therefore, resting cyst  
495 formation may be an important strategy for dinoflagellates to subsist over El Niño events.

496         Syndiniales are a group of parasitoid dinoflagellates that survive via dinoflagellate or  
497 metazoan hosts (Jephcott *et al.*, 2016). Metabarcoding techniques have revealed that these  
498 parasites are more prevalent than previously recognized (Guillou *et al.*, 2008), and this too is the  
499 case in the GMR. Syndiniales groups I and II were dominant in 2015; both groups were  
500 simultaneously detected in 2016 except at sites five and 18. In 2016, site 18 notably had a  
501 dinoflagellate community highly dominated by Syndiniales I. Syndiniales III covered a larger  
502 spatial extent in 2015 than 2016 but generally followed the same trend as Syndiniales I and II,  
503 such that relative proportions were typically less in 2016 (Figure 5b). One caveat of our  
504 metabarcoding approach is that it does not distinguish between free-living cells and host  
505 associated parasites, which makes the ecological role of Syndiniales difficult to assess.  
506 Notwithstanding, higher relative proportions of Syndiniales during the El Niño may be a result of  
507 increased infection rates since host cell death precedes the release of Syndiniales spores  
508 (Jephcott *et al.*, 2016; Clarke *et al.*, 2019). *Ameobophyra*, a specific Syndiniales genus identified  
509 in the GMR (Figure 5b), is estimated to use half of its host's biomass for spores leaving the other  
510 half as particulate and dissolved organic matter (Salomon and Stolte, 2010; Jephcott *et al.*, 2016).  
511 While Syndiniales can exploit photosynthetic hosts, Syndiniales I have been found to correlate  
512 positively with Chl *a*, perhaps implying its association with high host biomass or productive

513 regions (Clarke *et al.*, 2019). Despite the high detection of Syndiniales, particularly during the El  
514 Niño, their effect on primary productivity and food web dynamics remains unclear.

515         The chlorophyta or green algae had a total of 163 identified OTUs within six genera. The  
516 six genera are displayed with an ‘other’ group which consists of chlorophytes that could not be  
517 identified to the genus level (Figure 5c). The most common genera was *Bathycoccus*, the  
518 subclades A and B from clade VII of the prasinophytes (Lopes Dos Santos *et al.*, 2017), which  
519 we refer to as Prasinophyte A and Prasinophyte B, and *Ostreococcus*. Prasinophyte A and B  
520 made up a large relative proportion at many of the sites (Figure 5c), consistent with other studies  
521 within the EEP region (Collado-Fabbri, Vaultot and Ulloa, 2011; de Vargas *et al.*, 2015).

522         Spatial variation in chlorophyte communities was more apparent than shifts associated  
523 between years. Prasinophyte A, Prasinophyte B, and *Ostreococcus* were detected at all sites in  
524 2015. Similarly in 2016, these groups were detected at all sites except at sites five, 22, and 24  
525 which respectively lacked detection of either Prasinophyte B, *Ostreococcus*, or Prasinophyte A.  
526 Regardless of year, proportions of prasinophytes were generally highest in the east and slightly  
527 decreased westward (Figure 5c). *Ostreococcus* are cosmopolitan in protistan communities of  
528 the Peruvian coastal upwelling, and thus thrive under upwelling conditions, which could explain  
529 a higher detection at sites associated with the EUC (Collado-Fabbri, Vaultot and Ulloa, 2011; Rii  
530 *et al.*, 2016). Moreover, total NO<sub>3</sub><sup>-</sup> uptake rates and picoeukaryote cell abundance (via flow  
531 cytometry) best explained changes in chlorophyte communities (Spearman’s rho = 0.6826)  
532 (Table 1); the latter being expected given that many chlorophytes are small enough to be  
533 enumerated as picoeukaryotes. Chlorophyte communities showed the most spatial changes  
534 relative to the dinoflagellates and diatoms, such that genera spread along the vertical axis of the  
535 NMDS plot (Figure 6).



536 The diatoms consisted of 78 identified OTUs within 15 genera. Diatom communities  
537 were well represented with seven genera and an ‘other’ group that mainly comprised of those  
538 which were unidentifiable to the genus level (Figure 5d). Diatoms were not detected through 18S  
539 sequencing at sites five or 26 in 2016 but may have been present at low abundances. Patterns of  
540 primary productivity by small cells and *Prochlorococcus* cell abundance provided the best  
541 prediction of diatom community change (Spearman’s  $\rho = 0.3671$ ) (Table 1). Given the patchy  
542 spatial extent of diatoms detected, the ability to predict the changes in the diatom community  
543 from the oceanographic variables was lower relative to the other groups.

544 Two common diatom genera, *Corethron* and *Pseudo-nitzschia* had slight temporal trends  
545 and are hypothesized to be somewhat regulated by the EUC upwelling conditions (Torres and  
546 Tapia, 2000; McCulloch, 2011). During 2015, *Pseudo-nitzschia* was present at the western sites  
547 (sites 3-5) and site 18. Similarly, during the 2006/07 El Niño, *Pseudo-nitzschia* was a dominant  
548 phytoplankton species north and west of Isabela Island (McCulloch, 2011). *Pseudo-nitzschia* was  
549 however still highly detected in 2016 at site 22. In prior neutral periods, this diatom genus has  
550 been observed in patchy distributions (Torres and Tapia, 2000; Tapia and Naranjo, 2012).  
551 *Corethron* followed opposite trends, such that it represented a higher proportion at sites 1, 3, and  
552 4 in the neutral period while in 2015 it was only detected at site 4. Similarly, a 10-fold decrease  
553 in *Corethron* was measured during the 2006/07 El Niño relative to its highest abundance during  
554 cooler, neutral periods (McCulloch, 2011). *Pseudo-nitzschia* species are detected in the diatom  
555 community even in low nutrient conditions, likely due to physiological advantages, while  
556 *Corethron* are present in greater proportions at sites 1-4 in 2016, likely benefitting from the  
557 nutrient-rich neutral period. Two other ubiquitous diatom genera, *Chaetoceros* and  
558 *Thalassiosira*, were omnipresent in the GMR and have been previously identified during various

559 seasons and stages of ENSO (Torres and Tapia, 1998; McCulloch, 2011; Tapia and Naranjo,  
560 2012; Naranjo and Tapia, 2015). *Chaetoceros* can form resting spores anticipatory of upwelling  
561 relaxation (Pitcher *et al.*, 1991), fair well under horizontal advection (Tilstone *et al.*, 2015), and  
562 germinate rapidly (Smayda, 2000), which may explain their higher proportions at western sites in  
563 both 2015 and 2016 (Figure 5d).

#### 564 **Deep water mass properties influence protist communities**

565 The protistan community varied most between the El Niño and neutral periods, but also  
566 had some spatial patterns, such that western and eastern sites formed groupings (Figure 6). From  
567 the BIO-ENV analysis, this variation in protistan community composition is best explained  
568 (Spearman's  $\rho = 0.6239$ ) collectively by patterns of total  $\text{NO}_3^-$  uptake, picoeukaryote and  
569 *Prochlorococcus* cell abundances, and the density of subthermocline layer water masses (Table  
570 1). Interestingly, *Synechococcus* abundance and density of the subthermocline layer had the  
571 highest BIO-ENV model predictability of any two variables combined ( $\rho = 0.5664$ ) (Table 1).  
572 Moreover, regressions between select individual variables and community dissimilarities showed  
573 that *Synechococcus* had the highest correlation with community change ( $R^2 = 0.7271$ ), due to its  
574 significant correlation with dinoflagellate and chlorophyte community subgroups  
575 (Supplementary Table 4). Dinoflagellates, the subgroup of the protistan community which  
576 varied the most, also had the strongest correlation with the density of the subthermocline layer  
577 ( $R^2=0.73$ ) (Supplementary Table 4).

578 In the broader EEP, phytoplankton biomass has been linked to changes in deep water  
579 mass conditions below the thermocline, such that decreases in Chl *a* biomass due to El Niño  
580 events can be detected before SST anomalies (Park, Dunne and Stock, 2018). Thermocline depth  
581 has also previously been identified as important for predicting Chl *a* concentrations in the GMR

582 (Palacios, 2002; Sweet *et al.*, 2007). In this study, the lack of strong correlation between the  
583 protistan communities with mixed layer properties is likely due to protists, particularly  
584 dinoflagellates, responding to deep water mass shifts before they are detected in the mixed layer.  
585 The EUC, a deep nutrient-rich current that slows during El Niño, not only upwells on the western  
586 side of the Galápagos platform, but flows horizontally around Isabela Island and continues  
587 eastward, providing deep water mass sources from the north and south to the archipelago  
588 (Jakoboski *et al.*, 2020). The EUC likely influenced the observed spatio-temporal changes in  
589 protistan communities over the 2015/16 El Niño. These observations also provide support that  
590 protistan communities change in conjunction with cyanobacteria populations, and that the  
591 density of the subthermocline layer is a critical environmental indicator of that shift in  
592 community composition, both of which are attributes of the broader EEP (Masotti *et al.*, 2010;  
593 Park, Dunne and Stock, 2018).

594

## 595 **Conclusions**

596 Changes in water density profiles coupled with the nutrient regime suggest an observed  
597 weakening of the EUC, selecting for different phytoplankton size classes over the 2015/16  
598 ENSO. In 2015, waters were less dense and had lower  $\text{Si(OH)}_4:\text{NO}_3^-$  ratios relative to the cooler,  
599 2016 neutral period. Increased nutrient availability in 2016 likely led to increases in nitrate  
600 utilization by large cells such as diatoms and dinoflagellates. Despite appreciably lower primary  
601 productivity at western sites in 2015 compared to 2016, overall primary productivity of  
602 phytoplankton communities did not significantly differ across the entire archipelago due to local  
603 hotspots during El Niño (e.g., sites 14, 16) and small phytoplankton having higher primary

604 productivity in 2015 at many stations, offsetting the higher  $\text{NO}_3^-$  uptake in both small and large  
605 phytoplankton during 2016.

606 Protistan communities varied distinctly in the GMR during the 2015/16 ENSO.

607 Chlorophytes were detected in high abundance in both years, varied spatially, and correlated  
608 with  $\text{NO}_3^-$  uptake, picoeukaryote abundance, and *Synechococcus*. Diatoms had a patchy spatial  
609 extent making causes for changes difficult to discern, yet primary productivity by small cells and  
610 *Prochlorococcus* abundances were significant correlates. The largest difference between  
611 protistan communities however, was in the dinoflagellate group, such that *Syndiniales* were  
612 highly detected in 2015 while *Gyrodinium* were dominant in 2016. Dinoflagellates also  
613 happened to correlate strongly with primary productivity of small phytoplankton, picoeukaryote  
614 abundance and the density of the subthermocline layer.

615 The strongest correlation between the oceanographic variables and the entire protistan  
616 community composition over the 2015/16 ENSO was the density of the subthermocline layer – a  
617 proxy for shifts in deep water masses. These findings indicate that the water mass sources are an  
618 important factor in influencing protistan seed populations in the mixed layer whereas fluctuations  
619 in the short-term oceanographic conditions may have a more profound influence on their overall  
620 abundance and physiological status. Our observations provide motivation to continue to  
621 understand the effects of El Niño events on the microbial food-webs in the Galápagos  
622 Archipelago and the surrounding EEP region; specifically, to identify how changes in  
623 productivity and protistan community composition, as a function of altered ocean circulation,  
624 will influence higher marine trophic levels.

625

626

627 **Supplemental Information**

628 **Additional Methods**

629 **Phytoplankton biomass**

630 Chl *a*, a proxy for phytoplankton biomass, was collected in triplicate by gravity filtering  
631 400 ml of seawater through Isopore 5  $\mu\text{m}$  polycarbonate filters (47 mm) to obtain the large size-  
632 fraction ( $> 5 \mu\text{m}$ ). The filtrate was then filtered onto a Whatman GF/F filter (25mm) using an in-  
633 line vacuum ( $\leq 100 \text{ mmHg}$ ) to obtain the small size-fraction ( $\leq 5 \mu\text{m}$ ). The filters were extracted  
634 in 6 ml of 90% acetone and incubated in the dark at  $-20 \text{ }^\circ\text{C}$  for 24 hours. Raw fluorescence  
635 values of the Chl *a* extracts were measured on a Turner Designs 10-AU fluorometer according to  
636 the methods of Brand et al. (1981). Dissolved inorganic nutrients (nitrate + nitrite, phosphate  
637 and silicic acid) were measured by filtering 30 ml of water through a  $0.2 \mu\text{m}$  filter, using acid-  
638 washed syringes into a polypropylene Falcon<sup>TM</sup> tube. Dissolved nutrient concentrations were  
639 analyzed using a OI Analytical Flow Solutions IV auto analyzer by Wetland Biogeochemistry  
640 Analytical Services at Louisiana State University.

641 Picophytoplankton counts, specifically *Prochlorococcus*, *Synechococcus*, and  
642 picoeukaryote populations were quantified using flow cytometry. Two ml whole seawater  
643 samples were collected at each depth and preserved using a 10% preservative cocktail consisting  
644 of 40% phosphate-buffered saline solution (PBS), 10% formalin, and 0.5% glutaraldehyde  
645 (Marie, Simon and Vaultot, 2005). Following 15 minutes on ice to allow the preservative to  
646 permeate membranes, samples were frozen at  $-20 \text{ }^\circ\text{C}$  until analysis onshore. *Prochlorococcus*,  
647 *Synechococcus*, and photosynthetic picoeukaryotes in seawater samples were enumerated using a  
648 BD FACSCalibur Flow Cytometer and populations characterized as previously described  
649 (Johnson et al., 2010). Briefly, cells were excited with a 488 nm laser (15 mW Ar) and inelastic

650 forward ( $<15^\circ$ ) scatter, inelastic side ( $90^\circ$ ) scatter (SSC), green ( $530 \pm 30$  nm) fluorescence,  
651 orange fluorescence ( $585 \pm 42$  nm), and red fluorescence ( $> 670$  nm) emissions were measured.  
652 Population mean properties (scatter and fluorescence) were normalized to 1.0 or 2.0  $\mu\text{m}$  yellow  
653 green polystyrene beads (Polysciences, Warrington, PA).

#### 654 **Particulate nutrient concentrations and biological uptake rates**

655 Particulate nutrients, DIC and  $\text{NO}_3^-$  uptake rates were sampled to assess water quality and  
656 phytoplankton productivity. Triplicate acid-washed polycarbonate bottles (618 ml) were filled  
657 with seawater from each of the four light depths and incubated on deck in tanks for 24 hr,  
658 beginning between 6:00 - 8:00am to capture photosynthesis and respiration cycles congruently  
659 across sites. The tanks were flushed with surface seawater via a flow-through system and  
660 covered with screening to mimic the incident irradiance depths at which the water samples were  
661 collected. Tracer isotope additions of  $\leq 10\%$  of ambient nutrient concentrations were used to  
662 measure uptake rates following methods described in Slawyk et al. (1977) (Slawyk, Collos and  
663 Auclair, 1977). For isotope additions in the field, ambient nitrate and bicarbonate were assumed  
664 to be 5  $\mu\text{M}$  and 1200  $\mu\text{M}$ , respectively. Nitrite concentration was assumed to be  $< 5\%$  of ambient  
665 N, therefore N uptake rates were assumed to be that of nitrate. Nitrate uptake was measured by  
666 adding 0.5  $\mu\text{M}$   $^{15}\text{N}$ -labelled  $\text{NO}_3^-$  to each bottle prior to incubation (Dugdale and Goering, 1967).  
667 Dissolved inorganic carbon (DIC) uptake rates were measured by adding 120  $\mu\text{M}$   $^{13}\text{C}$ -labeled  
668  $\text{HCO}_3^-$  to each bottle prior to incubation (Hama *et al.*, 1983). After incubation, the bottle contents  
669 were filtered to capture the plankton community at 24 hr of exposure to the trace isotopes. The  
670 large size-fraction ( $> 5 \mu\text{m}$ ) was filtered onto a 5  $\mu\text{m}$  polycarbonate filter (47 mm) and the  
671 remaining filtrate was filtered onto a pre-combusted (450  $^\circ\text{C}$  for 5 hours) GF/F (25 mm) to obtain  
672 the small size-fraction ( $\leq 5 \mu\text{m}$ ). The particles trapped on the 5  $\mu\text{m}$  polycarbonate filters were

673 rinsed with particle-free (0.2  $\mu\text{m}$  filtered) seawater onto a separate pre-combusted GF/F. The  
674 filters were dried for 24 to 48 hours in a combustion oven at 60  $^{\circ}\text{C}$ , wrapped in tin foil squares  
675 (30x30mm, Elemental Analysis D1067), pelletized, and stored in a desiccator. Filters were sent  
676 to the Stable Isotope Facility at University of California Davis for mass spectrometry analysis.  
677 Measurements of particulate nitrogen (PN) and particulate carbon (PC) were obtained  
678 simultaneously with uptake rates of nitrate and dissolved inorganic carbon (DIC). Dissolved  
679 nitrate concentrations, PN, PC and  $^{15}\text{N}$  and  $^{13}\text{C}$  atom percentages were used to calculate  
680 volumetric  $\text{NO}_3^-$  uptake and DIC uptake rates of the different size fractions as according to  
681 Dugdale and Goering (1967) (Dugdale and Goering, 1967). Samples were not acidified to  
682 remove particulate inorganic carbon.  $\text{NO}_3^-$  uptake rates were not corrected for possible losses of  
683  $^{15}\text{N}$  in the form of dissolved organic nitrogen (Bronk, Glibert and Ward, 1994); therefore, the  
684 reported values are considered conservative estimates or net uptake. Chl *a*, particulate nutrients  
685 and nutrient uptake rates, as well as dissolved nutrient concentrations are displayed in  
686 Supplementary Table 3.

### 687 **Sequence library preparation for 18S amplicon sequencing**

688 For protist taxonomic identification and proportions, four liters of seawater from 50%  
689 incident irradiance at the 18S sites (Figure 1a) was filtered using an in-line vacuum (< 100  
690 mmHg) through 0.45  $\mu\text{m}$  NES membrane filters (Pall, 47 mm). DNA was extracted from filters  
691 using the Qiagen DNeasy Plant Mini Kit (Qiagen, Germantown, MD, USA) and manufacturer  
692 provided protocol. DNA concentrations were quantified using the Quant-iT dsDNA High-  
693 Sensitivity Assay kit (Life Technologies, Carlsbad, CA, USA). Extracts were diluted either 1:10  
694 or 1:100 so that the DNA concentrations were between 20-50 ng/ $\mu\text{l}$ .

695

696 The V4 hypervariable region of the 18S rRNA gene (600 bp) was targeted and amplified using a  
697 two-step PCR method described in Quigley et al., 2014. The forward linker primer (5'- TCG  
698 TCG GCA GCG TC + A *GAT GTG TAT AAG AGA CAG* + NNNN +  
699 **CCAGCASCYGC GGTAATTCC** -3'), and the reverse linker primer (5'- GTC TCG TGG GCT  
700 CGG + *AGA TGT GTA TAA GAG ACAG* + NNNN + **ACTTTCGTTCTTGAT** -3') were used  
701 in the first PCR and barcodes were attached during the second PCR. The underlined nucleotide  
702 bases are the linker sequences, the italicized bases are spacer sequences, the N's are degenerative  
703 nucleotide bases (which were not used for this study), and the bold bases are the V4-18S  
704 eukaryotic target sequences. The reagents used for the first PCR included 15 µl Milli-Q water,  
705 2.4 µl ExTaq buffer, 1 µl of forward linker primer, 1 µl of reverse linker primer, 1 µl of ExTaq  
706 dNTPs, and 0.125 µl of ExTaq enzymes (Takara Bio Inc., Katsastu, Japan). Five µl of diluted  
707 DNA extract was added to the reaction mixture. Samples were run in a thermocycler at 95 °C for  
708 5 min, 30 cycles at 95 °C for 40 s, 59 °C for 2 min, and 72 °C for 1 min, followed by a third stage  
709 at 72 °C for 7 min. Products of the reaction were checked on a 1% agarose gel. Products were  
710 cleaned using the Qiagen Qiaquick PCR purification kit (Qiagen, Germantown, MD, USA) and  
711 manufacturer provided protocol. The reagents used for the second PCR included 9.5 µl Milli-Q  
712 water, 3 µl of barcoded forward primer, 3 µl of barcoded reverse primer, 2 µl ExTaq buffer, 0.5  
713 µl of ExTaq dNTPs, and 0.1 µl of ExTaq enzyme. Two µl of PCR product from the first reaction,  
714 diluted to 10 ng/µl was added to the reaction mixture. Samples were run in the thermocycler at  
715 95 °C for 5 min, 4-10 cycles at 95 °C for 40 s, 59 °C for 2 min, and 72 °C for 1 min, followed by  
716 a third stage at 72 °C for 7 min. Samples were checked on a 1% agarose gel every 2 cycles until  
717 faint bands were achieved. Products were excised from the gel and cleaned using the Qiagen Gel  
718 Extraction kit (Qiagen, Germantown, MD, USA) and manufacturer provided protocol. DNA



719 concentrations of the products were quantified, and samples were pooled each at a concentration  
720 of 10 ng/ $\mu$ l. The pool was run in a single large gel lane on a 1% SYBR Green (Invitrogen,  
721 Carlsbad, CA, USA) stained gel. The amplicon library was excised from the gel and submitted  
722 for sequencing to the University of North Carolina at Chapel Hill High Throughput Sequencing  
723 Facility across two lanes of Illumina MiSeq (2 $\times$ 300 base pairs).

724

725

726

727

728

729

730

731

732

733

734

735

736

737

738

739

740

741

**A**

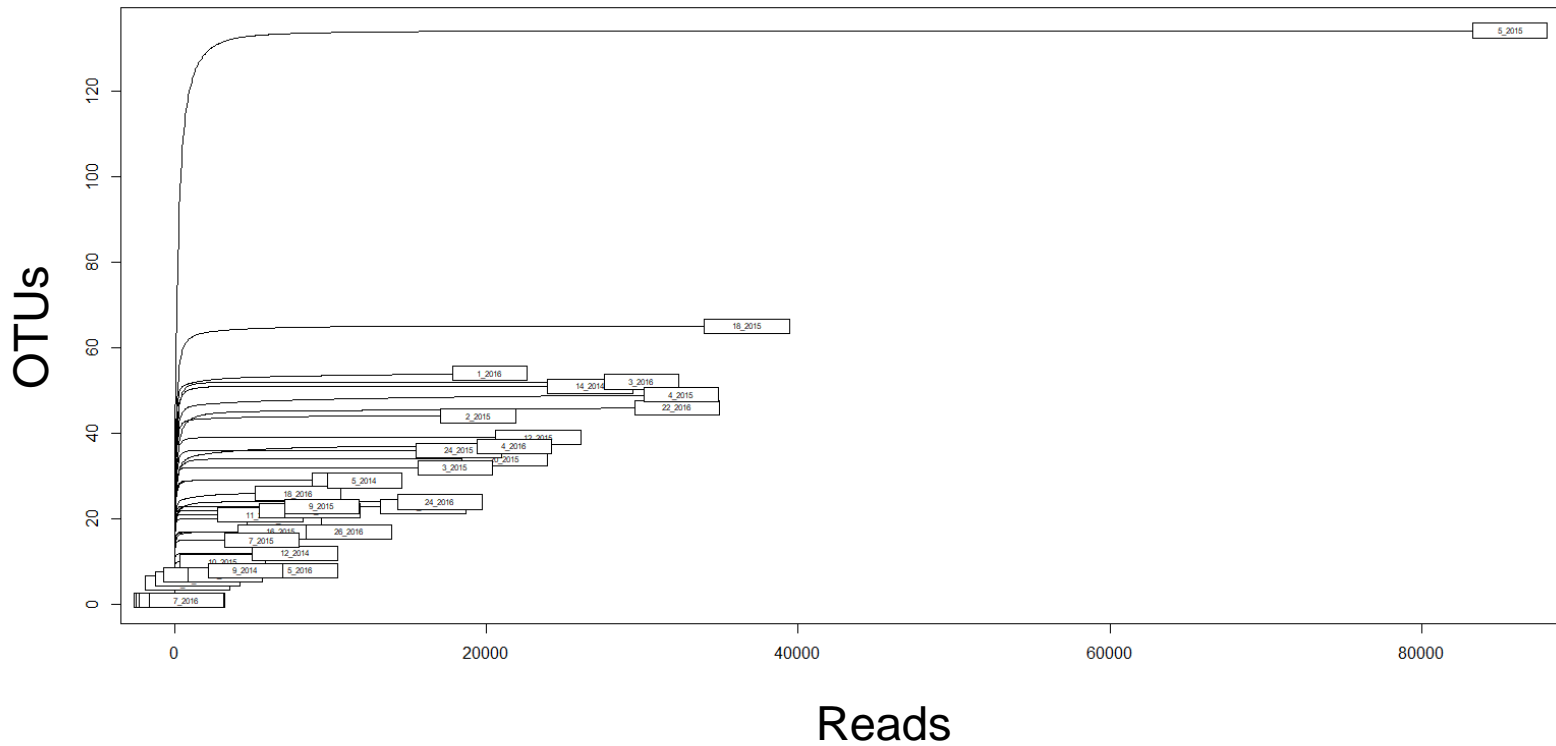

**B**

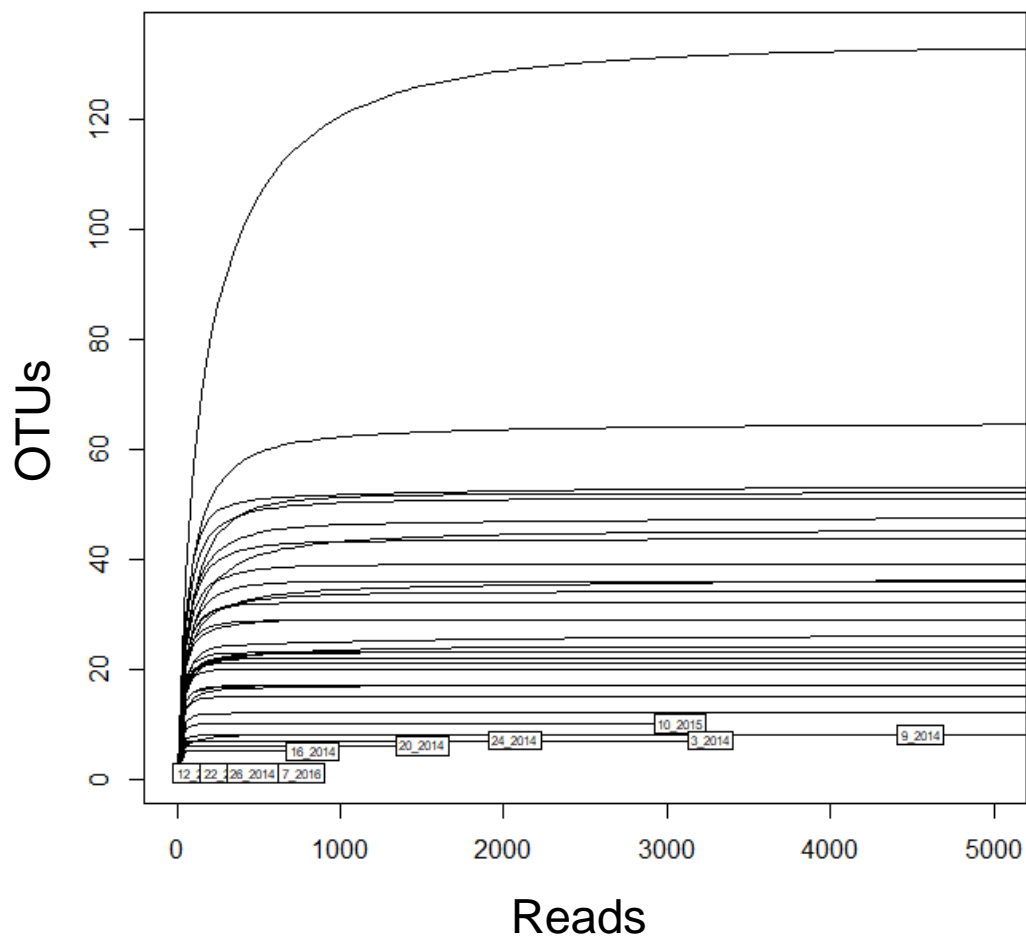

742 **Supplementary Figure 1.**

743 Rarefaction curves (technical replicates have been pooled). A) Rarefaction curves for 39  
744 samples. B) Same as chart A, with x-axis set from 0 to 5000 reads. Samples were rarefied to  
745 2066 reads. Note that OTU values on these plots reflect OTUs before custom taxonomy was  
746 assigned.

747

748

749

750

751

752

753

754

755

756

757

758

759

760

761

762

763

764

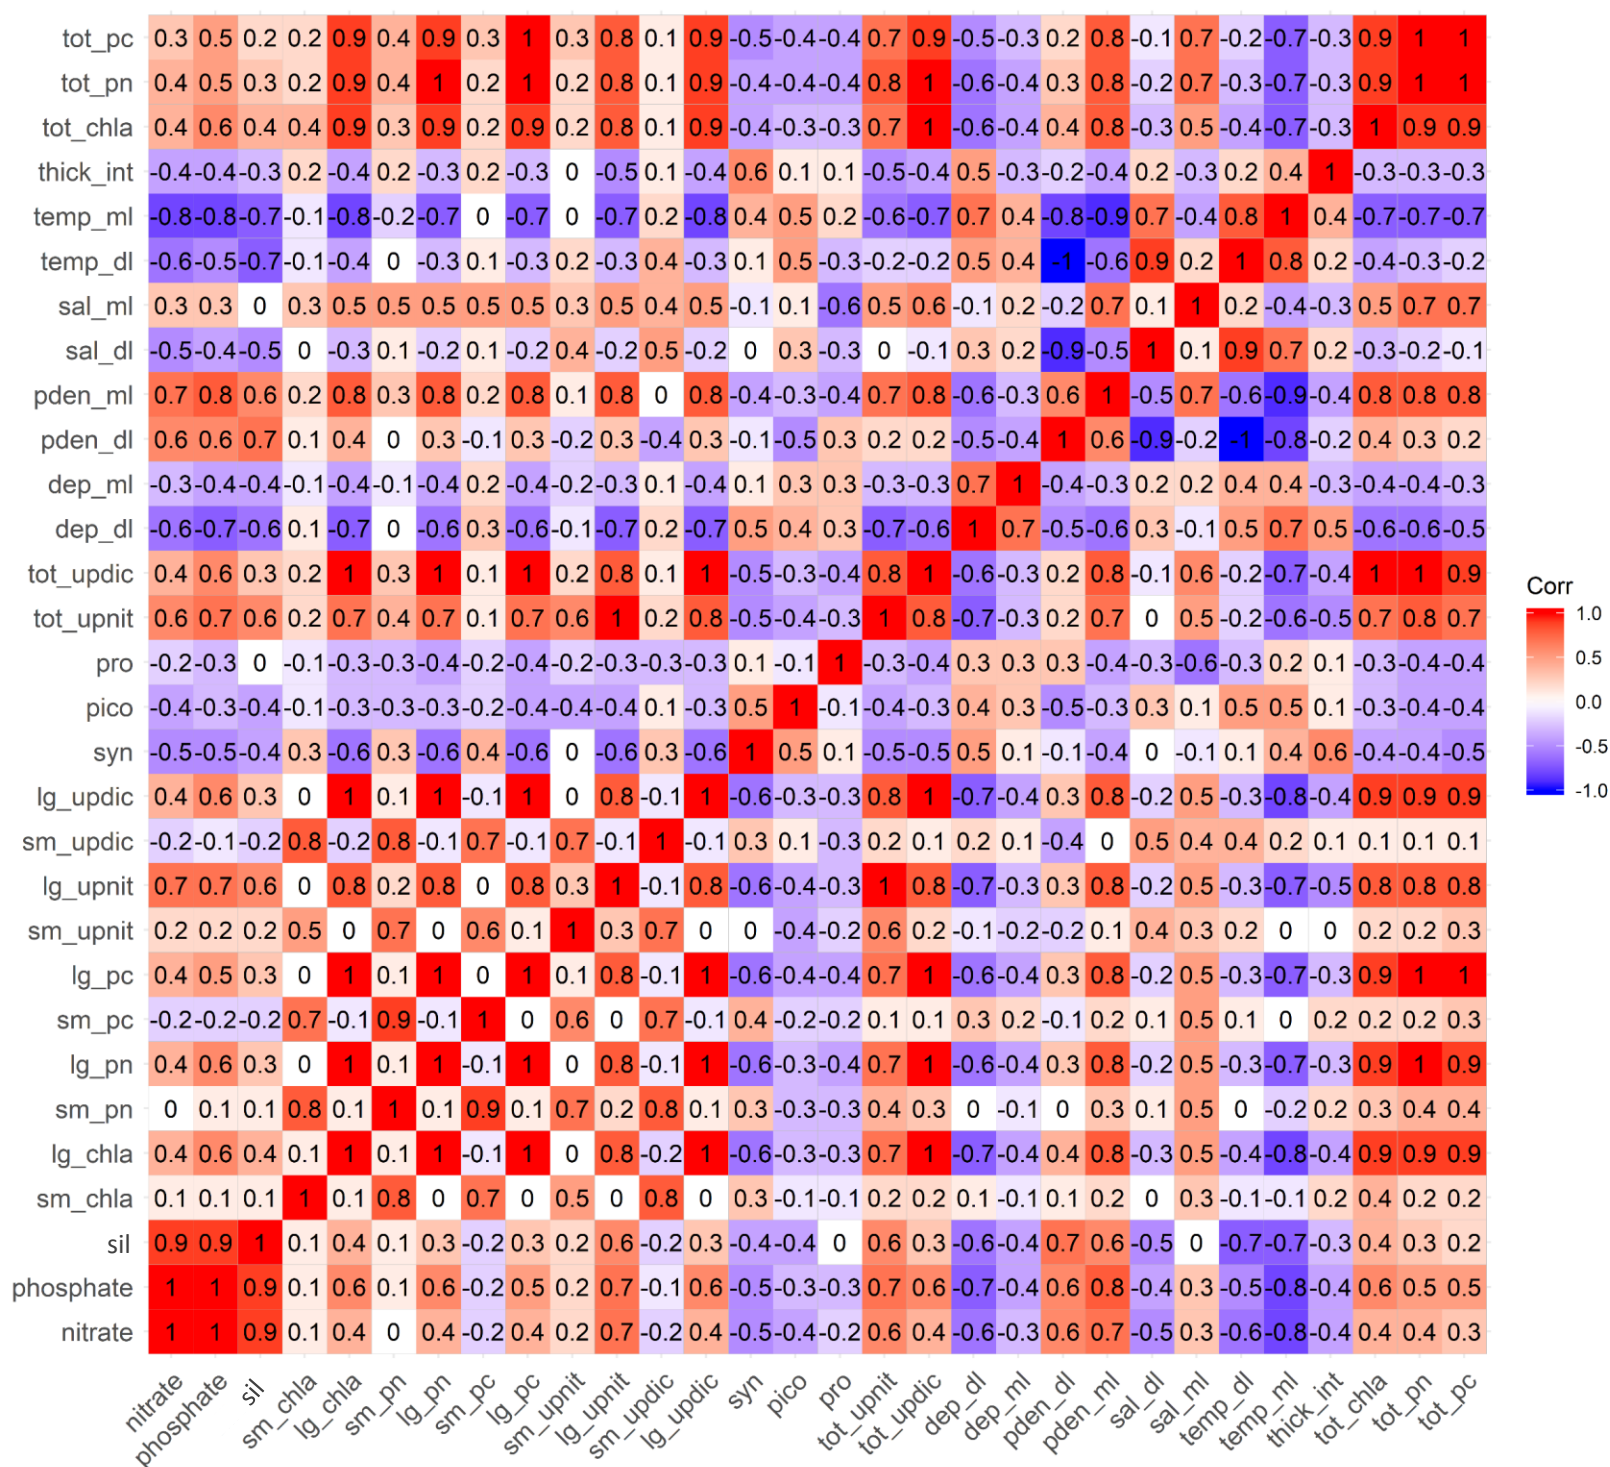

765 **Supplementary Figure 2.**

766 Correlation matrix of variables. Some variables are abbreviated such that: sil = silicic acid  
767 concentration; sm\_chla = chlorophyll-a concentration (mg/L) of the small (<5 µm)  
768 phytoplankton size-fraction; lg\_chla = chlorophyll-a concentration (mg/L) of the large (>5 µm)  
769 phytoplankton size-fraction; sm\_pn = particulate nitrogen (<5 µm); lg\_pn = particulate nitrogen  
770 (>5 µm); sm\_pc = particulate carbon (<5 µm); lg\_pc = particulate carbon (>5 µm); sm\_upnit =  
771 nitrate uptake by the small (<5 µm) phytoplankton size-fraction; lg\_upnit = nitrate uptake by the  
772 large (>5 µm) phytoplankton size-fraction; sm\_updic = dissolved inorganic carbon uptake by the  
773 small (<5 µm) phytoplankton size-fraction; lg\_updic = dissolved inorganic carbon uptake by the  
774 large (>5 µm) phytoplankton size-fraction; syn = *Synechococcus* flow-cytometry counts; pico =  
775 picoeukaryote flow-cytometry counts; pro = *Prochlorococcus* flow-cytometry counts; pden\_dl =  
776 potential density of the subthermocline layer; tot\_upnit = total nitrate uptake of both large and  
777 small phytoplankton size-fractions; tot\_updic = total DIC uptake of both large and small  
778 phytoplankton size-fractions; dep\_dl = depth of the subthermocline layer; dep\_ml = depth of the  
779 mixed layer; pden\_dl = density of the subthermocline layer; pden\_ml = density of the mixed  
780 layer; sal\_dl = salinity of the subthermocline layer; sal\_ml = salinity of the mixed layer; temp\_dl  
781 = temperature of the subthermocline layer; temp\_ml = temperature of the mixed layer; thick\_int  
782 = distance between the bottom of the mixed layer and top of the subthermocline layer (interfacial  
783 layer); tot\_chla = total chlorophyll-a concentration (mg/L) of both large and small phytoplankton  
784 size-fractions; tot\_pc = total particulate carbon of both large and small size-fractions; tot\_pn =  
785 total particulate nitrogen of both large and small size-fractions.

786

787

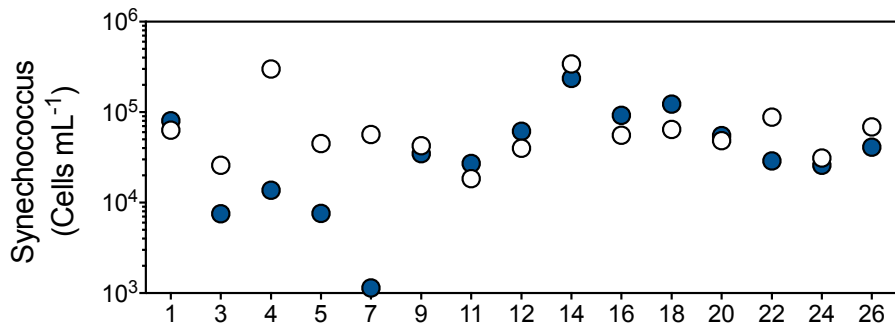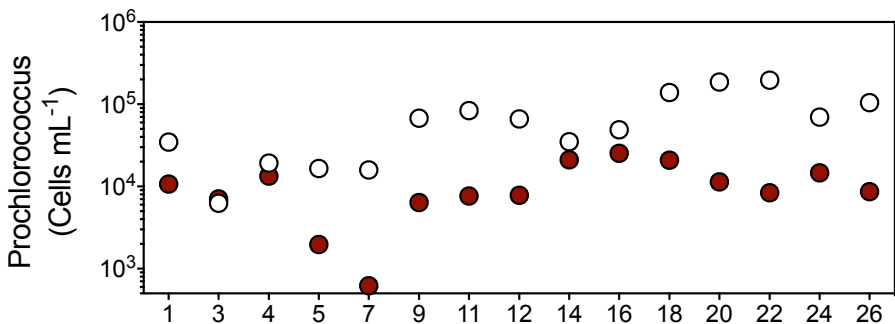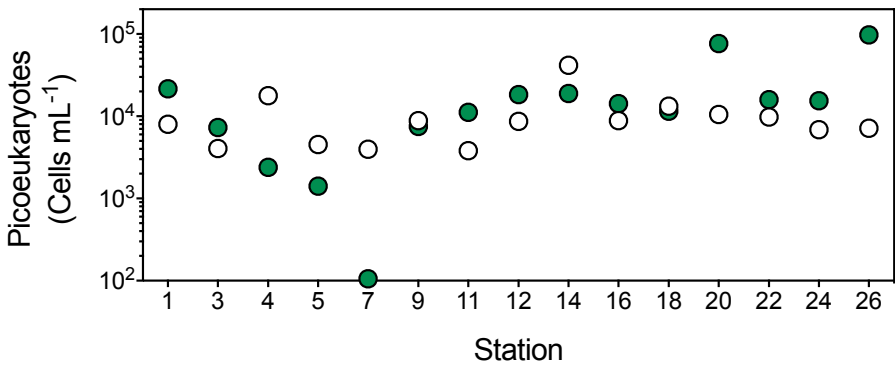

788 **Supplementary Figure 3.**

789 Flow cytometry cell counts at sampling sites in 2015 and 2016. White circles indicate cell

790 densities in 2015, while colored circles indicate cell densities in 2016.

791

792

793

794

795

796

797

798

799

800

801

802

803

804

805

806

807

808

809

810

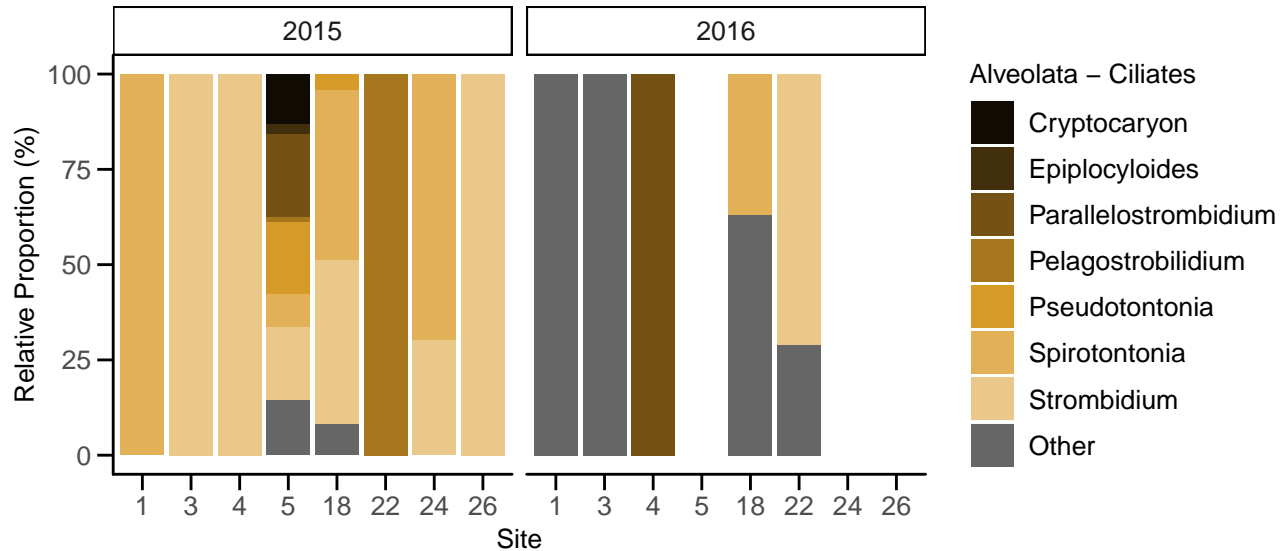



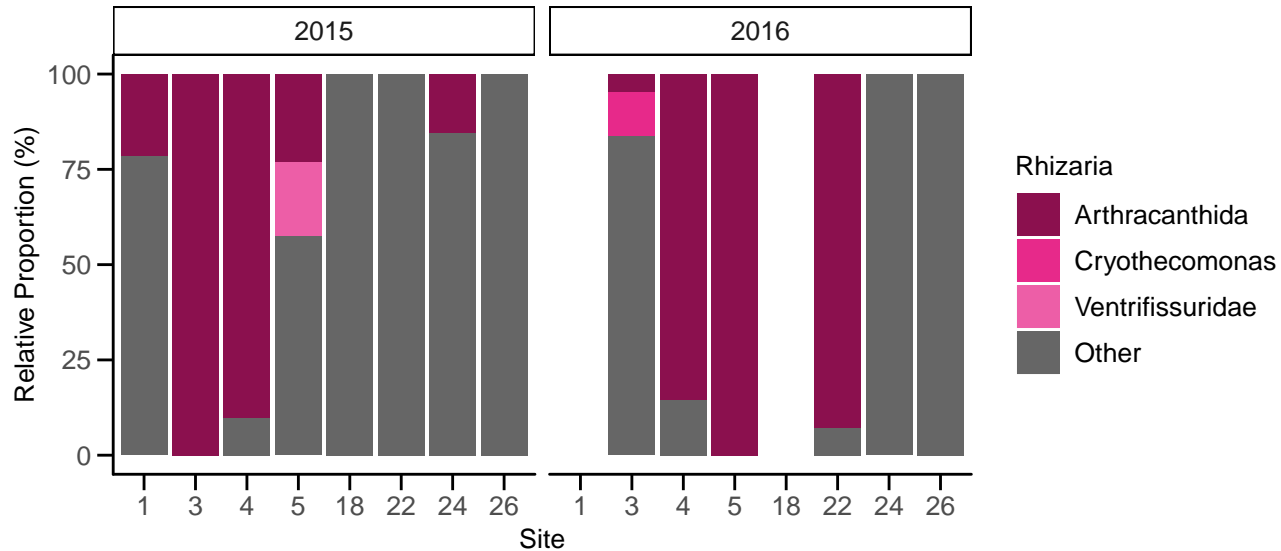

811 **Supplementary Figure 4.**

812 Ciliate and Rhizaria 18S rRNA gene community plots. A) Relative proportions of the Ciliate  
813 group, highlighting the top seven most abundant genera. B) Relative proportions of the Rhizaria  
814 group, highlighting the top three most abundant genera.

815

816

817

818

819

820

821

822

823

824

825

826

827

828

829

830

831

832

833

834 **Supplementary Table 1.**

835 Table of samples used for 18S rRNA gene analysis of ‘18S’ sites in this study. Samples are  
 836 derived from bolded samples in Appendix 1, some of which have been pooled from technical  
 837 replicates to obtain the values below. The final number of reads, or library size, was obtained  
 838 after blasting the assembled amplicons to the SILVA v. 123 reference database. The number of  
 839 different OTUs present in each sample before and after rarefaction is displayed. OTUs no.  
 840 values reflect adjustments made to unknown OTUs. If unknown OTUs were present in the same  
 841 Class they were classified as the same unknown grouping and reflected a single OTU.

| Site | Year | Reads  |          |          |        |              | OTUs               |     |              |
|------|------|--------|----------|----------|--------|--------------|--------------------|-----|--------------|
|      |      | input  | filtered | denoised | merged | non-chimeric | final no. of reads | Raw | After Rarefy |
| 1    | 2015 | 60327  | 27917    | 27917    | 13158  | 10576        | 7044               | 14  | 14           |
| 1    | 2016 | 191084 | 152385   | 152385   | 130136 | 28722        | 20227              | 15  | 15           |
| 3    | 2015 | 176261 | 52398    | 52398    | 24918  | 19463        | 17994              | 17  | 17           |
| 3    | 2016 | 86983  | 71192    | 71192    | 56869  | 33540        | 29945              | 26  | 26           |
| 4    | 2015 | 149983 | 120461   | 120461   | 94927  | 43158        | 32498              | 19  | 19           |
| 4    | 2016 | 130178 | 76059    | 76059    | 65219  | 26087        | 21793              | 19  | 19           |
| 5    | 2015 | 845886 | 761534   | 761534   | 589629 | 145115       | 85659              | 56  | 53           |
| 5    | 2016 | 21114  | 17367    | 17367    | 14640  | 11223        | 8063               | 8   | 8            |
| 18   | 2015 | 188403 | 100918   | 100918   | 59478  | 45265        | 36694              | 26  | 24           |
| 18   | 2016 | 62233  | 45655    | 45655    | 37554  | 8677         | 7928               | 10  | 10           |
| 22   | 2015 | 93016  | 53299    | 53299    | 33250  | 23350        | 15958              | 12  | 12           |
| 22   | 2016 | 187324 | 171043   | 171043   | 116206 | 46941        | 32238              | 22  | 22           |
| 24   | 2015 | 100552 | 66927    | 66927    | 42605  | 26749        | 18215              | 20  | 20           |
| 24   | 2016 | 78095  | 71395    | 71395    | 52183  | 22001        | 17021              | 12  | 12           |
| 26   | 2015 | 51114  | 34406    | 34406    | 20306  | 17974        | 11148              | 12  | 12           |
| 26   | 2016 | 43342  | 37709    | 37709    | 27984  | 19119        | 11163              | 10  | 10           |

842

843

844

845

846

847

848 **Supplementary Table 2.**

849 Custom taxonomy assigned to the Class taxonomic level (D\_2\_\_) originating from the SILVA v.

850 123 database.

| Class            | Custom Class   |
|------------------|----------------|
| Cryptomonadales  | Hacrobia       |
| Kathablepharidae | Hacrobia       |
| Prymnesiophyceae | Hacrobia       |
| Palpitomonas     | Hacrobia       |
| Telonema         | Hacrobia       |
| Discoba          | Excavata       |
| Nucleomycea      | Opisthokonts   |
| Picomonadida     | Other          |
| Alveolata        | Alveolata      |
| Chloroplastida   | Chloroplastida |
| Rhizaria         | Rhizaria       |
| Rhodophyceae     | Other          |
| Stramenopiles    | Stramenopiles  |
| Holozoa          | Other          |

851

852

853

854

855

856 **Supplementary Table 3.**

857 Summary statistics for dissolved and particulate nutrients, Chl *a*, primary productivity and nitrate

858 uptake rates. See supplementary Figure 2 for abbreviated variable key.

| Variable     | mean     |          | median   |          | independent 2-<br>group Mann-<br>Whitney U Test |          |
|--------------|----------|----------|----------|----------|-------------------------------------------------|----------|
|              | 2015     | 2016     | 2015     | 2016     | W                                               | p-value  |
| nitrate      | 2.157467 | 6.758967 | 1.6995   | 6.193    | 29                                              | 0.000264 |
| silicic acid | 1.808267 | 6.081933 | 1.654    | 4.985    | 12                                              | 3.51E-06 |
| sm_chla      | 0.334206 | 0.349624 | 0.224223 | 0.230617 | 93                                              | 0.4306   |
| lg_chla      | 0.196312 | 0.422502 | 0.125355 | 0.200933 | 67                                              | 0.06128  |
| tot_chla     | 0.528531 | 0.772019 | 0.407707 | 0.637963 | 72                                              | 0.09753  |
| sm_updic     | 2.442711 | 1.962444 | 1.901882 | 1.436667 | 132                                             | 0.4363   |
| lg_updic     | 1.280083 | 2.673333 | 0.462093 | 1.2      | 78                                              | 0.1607   |
| tot_updic    | 3.707268 | 4.561556 | 2.677045 | 3.146667 | 89                                              | 0.3453   |
| sm_upnit     | 198.8752 | 159.2167 | 81.37914 | 129.8633 | 108                                             | 0.8702   |
| lg_upnit     | 169.0535 | 342.1778 | 51.91571 | 131.64   | 69                                              | 0.0742   |
| tot_upnit    | 367.9203 | 494.6082 | 105.1708 | 329.3867 | 81                                              | 0.2017   |

859

| year | latitude | longitude | site | NO <sub>3</sub> <sup>-</sup><br>(μM) | PO <sub>4</sub> <sup>3-</sup><br>(μM) | Si(OH) <sub>4</sub><br>(μM) |
|------|----------|-----------|------|--------------------------------------|---------------------------------------|-----------------------------|
| 2015 | -1.08327 | -91.0913  | 1    | 5.0165                               | 0.523                                 | 2.4385                      |
| 2015 | -0.46945 | -91.6154  | 3    | 5.6755                               | 0.796                                 | 3.268                       |
| 2015 | -0.44772 | -91.3761  | 4    | 1.074                                | 0.408                                 | 3.1975                      |

|      |          |          |    |        |        |         |
|------|----------|----------|----|--------|--------|---------|
| 2015 | -0.28752 | -91.6564 | 5  | 1.6995 | 0.4345 | 1.017   |
| 2015 | -0.06255 | -91.5572 | 7  | 0.5475 | 0.5735 | 3.0915  |
| 2015 | 0.160683 | -91.3097 | 9  | 2.853  | 0.4845 | 2.0715  |
| 2015 | 0.548283 | -90.7919 | 11 | 0.193  | 0.3735 | 1.618   |
| 2015 | 0.286917 | -90.5176 | 12 | 2.6645 | 0.371  | 1.022   |
| 2015 | 0.306183 | -89.9517 | 14 | 0.7    | 0.294  | 0.613   |
| 2015 | -0.22822 | -90.8716 | 16 | 3.851  | 0.478  | 1.654   |
| 2015 | -0.36595 | -90.5421 | 18 | 2.3585 | 0.5485 | 1.328   |
| 2015 | -0.55573 | -90.1461 | 20 | 1.48   | 0.508  | 2.31    |
| 2015 | -1.20072 | -90.4423 | 22 | 2.637  | 0.5735 | 2.249   |
| 2015 | -1.33905 | -89.7414 | 24 | 1.478  | 0.445  | 0.9935  |
| 2015 | -0.68873 | -89.2281 | 26 | 0.134  | 0.383  | 0.2525  |
| 2016 | -1.08327 | -91.0913 | 1  | 3.232  | 0.524  | 2.902   |
| 2016 | -0.46945 | -91.6154 | 3  | 17.304 | 1.4265 | 14.0895 |
| 2016 | -0.44772 | -91.3761 | 4  | 9.2245 | 0.901  | 7.3305  |
| 2016 | -0.28752 | -91.6564 | 5  | 7.7885 | 0.789  | 4.985   |
| 2016 | -0.06255 | -91.5572 | 7  | 2.908  | 0.4855 | 1.7345  |
| 2016 | 0.160683 | -91.3097 | 9  | 5.603  | 0.6195 | 4.098   |
| 2016 | 0.548283 | -90.7919 | 11 | 8.3315 | 0.7935 | 6.599   |
| 2016 | 0.286917 | -90.5176 | 12 | 3.7985 | 0.669  | 3.126   |
| 2016 | 0.306183 | -89.9517 | 14 | 2.344  | 0.6065 | 4.193   |
| 2016 | -0.22822 | -90.8716 | 16 | 8.335  | 0.828  | 8.4035  |
| 2016 | -0.36595 | -90.5421 | 18 | 6.3325 | 0.7765 | 6.375   |
| 2016 | -0.55573 | -90.1461 | 20 | 4.0875 | 0.5285 | 4.876   |
| 2016 | -1.20072 | -90.4423 | 22 | 6.193  | 0.6425 | 6.594   |

|      |          |          |    |        |        |        |
|------|----------|----------|----|--------|--------|--------|
| 2016 | -1.33905 | -89.7414 | 24 | 14.535 | 1.203  | 11.628 |
| 2016 | -0.68873 | -89.2281 | 26 | 1.3675 | 0.4045 | 4.295  |

860

|      |      | mean              | mean              | mean               | standard deviation | standard deviation | standard deviation |
|------|------|-------------------|-------------------|--------------------|--------------------|--------------------|--------------------|
| year | site | sm_pn<br>(nmol/L) | lg_pn<br>(nmol/L) | tot_pn<br>(nmol/L) | sm_pn              | lg_pn              | tot_pn             |
| 2015 | 1    | 1392.873          | 524.3925          | 1917.266           | 197.2441           | 185.0112           | 193.3588           |
| 2015 | 3    | 1263.166          | 1449.514          | 2712.68            | 266.6868           | 245.371            | 200.0526           |
| 2015 | 4    | 1709.851          | 597.4289          | 2307.28            | 191.5843           | 218.3932           | 26.80889           |
| 2015 | 5    | 1325.54           | 1069.004          | 2394.543           | 104.2701           | 31.07704           | 100.2418           |
| 2015 | 7    | 906.2676          | 770.768           | 1677.036           | 512.5574           | 130.8078           | 389.7119           |
| 2015 | 9    | 885.3941          | 650.482           | 1535.876           | 73.24488           | 421.7521           | 414.527            |
| 2015 | 11   | 935.1361          | 340.5332          | 1275.669           | 136.0965           | 43.05484           | 130.1387           |
| 2015 | 12   | 695.9137          | 466.6674          | 1162.581           | 376.425            | 50.11469           | 425.5941           |
| 2015 | 14   | 2528.893          | 470.1441          | 2999.037           | 196.9775           | 125.9723           | 100.7986           |
| 2015 | 16   | 1799.034          | 1804.49           | 3603.525           | 339.6629           | 548.5873           | 408.6837           |
| 2015 | 18   | 1271.441          | 587.7022          | 1859.143           | 122.6524           | 240.593            | 159.2031           |
| 2015 | 20   | 976.7436          | 523.3313          | 1500.075           | 519.1229           | 459.3802           | 169.1233           |
| 2015 | 22   | 954.3289          | 745.4182          | 1699.747           | 122.2689           | 430.922            | 500.2987           |
| 2015 | 24   | 927.9323          | 781.1187          | 1709.051           | 553.4452           | 518.2618           | 84.22699           |
| 2015 | 26   | 914.6053          | 558.8385          | 1473.444           | 85.72798           | 50.27337           | 98.89218           |
| 2016 | 1    | 1373.89           | 783.57            | 2157.46            | 33.51172           | 165.3045           | 147.6448           |
| 2016 | 3    | 1374.937          | 2229.037          | 3603.973           | 178.4089           | 88.74901           | 146.9314           |
| 2016 | 4    | 1549.96           | 3677.58           | 5227.54            | NA                 | NA                 | NA                 |

|      |    |          |          |          |          |          |          |
|------|----|----------|----------|----------|----------|----------|----------|
| 2016 | 5  | 1036.717 | 2463.55  | 3500.267 | 97.76806 | 288.4142 | 222.2838 |
| 2016 | 7  | 1860.9   | 2285.52  | 4146.42  | 391.312  | 223.41   | 301.7416 |
| 2016 | 9  | 982.0933 | 2017.673 | 2999.767 | 206.0789 | 158.0138 | 68.70205 |
| 2016 | 11 | 1131.64  | 848.8333 | 1226.047 | NA       | 55.91428 | 663.4499 |
| 2016 | 12 | 1068.987 | 949.3067 | 2018.293 | 52.88796 | 306.0843 | 355.8799 |
| 2016 | 14 | 2511.533 | 726.62   | 3238.153 | 217.9735 | 89.13549 | 142.8141 |
| 2016 | 16 | 1990.683 | 311.74   | 2302.423 | 98.49966 | 49.06905 | 146.9604 |
| 2016 | 18 | 1794.35  | 463.16   | 2257.51  | 41.18031 | 166.6094 | 171.6449 |
| 2016 | 20 | 1052.63  | 603.27   | 1655.9   | 79.62618 | 334.6954 | 402.3871 |
| 2016 | 22 | 1051.527 | 589.79   | 1641.317 | 28.63359 | 19.17819 | 31.44936 |
| 2016 | 24 | 894.7867 | 465.64   | 1360.427 | 78.99461 | 63.19213 | 90.50729 |
| 2016 | 26 | 859.48   | 262.4467 | 1121.927 | 116.3601 | 1.403436 | 117.4547 |

861

|      |      | mean                           | mean                           | mean                            | standard<br>deviation | standard<br>deviation | standard<br>deviation |
|------|------|--------------------------------|--------------------------------|---------------------------------|-----------------------|-----------------------|-----------------------|
|      | site | sm_pc<br>( $\mu\text{mol/L}$ ) | lg_pc<br>( $\mu\text{mol/L}$ ) | tot_pc<br>( $\mu\text{mol/L}$ ) | sm_pc                 | lg_pc                 | tot_pc                |
| 2015 | 1    | 9.012001                       | 2.986874                       | 11.99888                        | 3.130695              | 0.806295              | 2.392851              |
| 2015 | 3    | 7.221374                       | 7.986993                       | 15.20837                        | 1.736978              | 1.577957              | 1.762298              |
| 2015 | 4    | 9.094588                       | 4.202203                       | 13.29679                        | 0.731026              | 3.01544               | 2.284415              |
| 2015 | 5    | 7.280883                       | 7.194916                       | 14.4758                         | 0.70243               | 0.4825                | 0.681973              |
| 2015 | 7    | 5.452462                       | 4.21298                        | 9.665441                        | 3.610194              | 1.064037              | 2.569136              |
| 2015 | 9    | 5.398573                       | 4.390504                       | 9.789077                        | 0.642065              | 1.530488              | 1.842264              |
| 2015 | 11   | 5.435372                       | 1.733863                       | 7.169235                        | 2.25321               | 0.375027              | 2.295055              |
| 2015 | 12   | 3.265884                       | 2.339255                       | 5.60514                         | 1.690878              | 0.461255              | 1.942756              |



|      |    |          |          |          |          |          |          |
|------|----|----------|----------|----------|----------|----------|----------|
| 2015 | 14 | 18.40962 | 3.196466 | 21.60609 | 1.080984 | 0.941431 | 0.673006 |
| 2015 | 16 | 8.67628  | 11.36877 | 20.04505 | 0.630804 | 3.637747 | 4.039047 |
| 2015 | 18 | 7.515143 | 2.652905 | 10.16805 | 0.50914  | 2.048071 | 2.279657 |
| 2015 | 20 | 5.249063 | 2.658915 | 7.907978 | 2.420769 | 2.532813 | 0.782465 |
| 2015 | 22 | 5.715023 | 3.106268 | 8.821291 | 0.715471 | 2.178608 | 2.455808 |
| 2015 | 24 | 4.614055 | 3.04495  | 7.659005 | 2.775506 | 2.341621 | 0.481262 |
| 2015 | 26 | 4.994912 | 2.326362 | 7.321275 | 0.629223 | 0.459367 | 0.177925 |
| 2016 | 1  | 7.948667 | 4.270667 | 12.21933 | 0.276685 | 0.290676 | 0.392538 |
| 2016 | 3  | 6.105    | 12.52467 | 18.62967 | 0.396849 | 0.488686 | 0.113271 |
| 2016 | 4  | 8.564    | 19.64    | 28.204   | NA       | NA       | NA       |
| 2016 | 5  | 5.837333 | 14.31267 | 20.15    | 0.448536 | 2.132606 | 1.929112 |
| 2016 | 7  | 9.226    | 14.94533 | 24.17133 | 1.555803 | 2.119677 | 1.038851 |
| 2016 | 9  | 5.136667 | 10.45533 | 15.592   | 0.499829 | 0.187961 | 0.332608 |
| 2016 | 11 | 6.67     | 4.841    | 7.064333 | NA       | 0.732885 | 3.80346  |
| 2016 | 12 | 6.918667 | 4.926667 | 11.84533 | 1.163151 | 0.882565 | 2.026655 |
| 2016 | 14 | 14.16233 | 4.550667 | 18.713   | 0.940403 | 1.000958 | 1.253807 |
| 2016 | 16 | 10.67267 | 1.667667 | 12.34033 | 0.387807 | 0.245875 | 0.525508 |
| 2016 | 18 | 9.140667 | 2.351    | 11.49167 | 0.204671 | 0.293714 | 0.280293 |
| 2016 | 20 | 5.861333 | 3.766333 | 9.627667 | 0.397649 | 2.339338 | 2.421094 |
| 2016 | 22 | 5.673333 | 3.489667 | 9.163    | 0.848373 | 0.502693 | 0.759947 |
| 2016 | 24 | 4.616333 | 2.397    | 7.013333 | 0.553079 | 0.310598 | 0.264434 |
| 2016 | 26 | 4.930333 | 1.583333 | 6.513667 | 0.684293 | 0.137758 | 0.818881 |

862

863

|      |      | mean              | mean              | mean               | standard deviation | standard deviation | standard deviation |
|------|------|-------------------|-------------------|--------------------|--------------------|--------------------|--------------------|
| year | site | sm_chla<br>(µg/L) | lg_chla<br>(µg/L) | tot_chla<br>(µg/L) | sm_chla            | lg_chla            | tot_chla           |
| 2015 | 1    | 0.271717          | 0.135991          | 0.407707           | 0.027718           | 0.016219           | 0.026048           |
| 2015 | 3    | 0.236097          | 0.308935          | 0.545032           | 0.030888           | 0.117746           | 0.101418           |
| 2015 | 4    | 0.62061           | 0.125355          | 0.745965           | 0.158334           | 0.00535            | 0.163629           |
| 2015 | 5    | 0.264666          | 0.353442          | 0.618107           | 0.018209           | 0.022634           | 0.039772           |
| 2015 | 7    | 0.211             | 0.256             | 0.467              | 0.016371           | 0.015524           | 0.025239           |
| 2015 | 9    | 0.095215          | 0.070555          | 0.162551           | 0.008719           | 0.00567            | 0.007266           |
| 2015 | 11   | 0.074893          | 0.054252          | 0.129145           | 0.057838           | 0.005434           | 0.053563           |
| 2015 | 12   | 0.133411          | 0.09036           | 0.226754           | 0.000736           | 0.007499           | 0.006948           |
| 2015 | 14   | 1.32205           | 0.159377          | 1.47686            | 0.009687           | 0.014649           | 0.027125           |
| 2015 | 16   | 0.48224           | 0.885477          | 1.344655           | 0.009687           | 0.040417           | 0.000969           |
| 2015 | 18   | 0.555307          | 0.175817          | 0.731123           | 0.168015           | 0.01702            | 0.152319           |
| 2015 | 20   | 0.212504          | 0.069687          | 0.282192           | 0.021862           | 0.002093           | 0.021853           |
| 2015 | 22   | 0.17125           | 0.053247          | 0.222557           | 0.021312           | 0.006255           | 0.028771           |
| 2015 | 24   | 0.224223          | 0.087908          | 0.312132           | 0.071481           | 0.010183           | 0.079966           |
| 2015 | 26   | 0.137913          | 0.118277          | 0.25619            | 0.059816           | 0.009122           | 0.061939           |
| 2016 | 1    | 0.24249           | 0.119601          | 0.362091           | 0.014434           | 0.016421           | 0.030719           |
| 2016 | 3    | 0.310533          | 0.981377          | 1.29191            | 0.044315           | 0.147517           | 0.189035           |
| 2016 | 4    | 0.544347          | 0.91516           | 1.459507           | 0.389951           | 0.298657           | 0.16115            |
| 2016 | 5    | 0.184493          | 0.94119           | 1.124085           | 0.013306           | 0.156935           | 0.138529           |
| 2016 | 7    | 0.21783           | 1.429367          | 1.647197           | 0.03858            | 0.064744           | 0.101476           |
| 2016 | 9    | 0.184493          | 0.45347           | 0.637963           | 0.030828           | 0.007249           | 0.035205           |

|      |    |          |          |          |          |          |          |
|------|----|----------|----------|----------|----------|----------|----------|
| 2016 | 11 | 0.230617 | 0.287243 | 0.51786  | 0.021061 | 0.026577 | 0.023887 |
| 2016 | 12 | 0.202303 | 0.194997 | 0.3973   | 0.012729 | 0.019963 | 0.032304 |
| 2016 | 14 | 0.951237 | 0.27263  | 1.223867 | 0.092719 | 0.07475  | 0.12273  |
| 2016 | 16 | 0.649837 | 0.105901 | 0.755738 | 0.040925 | 0.009882 | 0.042926 |
| 2016 | 18 | 0.621067 | 0.089918 | 0.710984 | 0.037577 | 0.003839 | 0.033855 |
| 2016 | 20 | 0.216917 | 0.109874 | 0.326791 | 0.031161 | 0.013543 | 0.033058 |
| 2016 | 22 | 0.17262  | 0.200933 | 0.373553 | 0.041802 | 0.009623 | 0.050973 |
| 2016 | 24 | 0.336107 | 0.16166  | 0.497767 | 0.030888 | 0.014303 | 0.031905 |
| 2016 | 26 | 0.17947  | 0.074208 | 0.253678 | 0.0214   | 0.019151 | 0.03997  |

864

|      |      | mean                                  | mean                                  | mean                                   | standard<br>deviation | standard<br>deviation | standard<br>deviation |
|------|------|---------------------------------------|---------------------------------------|----------------------------------------|-----------------------|-----------------------|-----------------------|
| year | site | sm_updic<br>( $\mu\text{mol/L/day}$ ) | lg_updic<br>( $\mu\text{mol/L/day}$ ) | tot_updic<br>( $\mu\text{mol/L/day}$ ) | sm_updic              | lg_updic              | tot_updic             |
| 2015 | 1    | 1.901882                              | 0.462093                              | 2.363976                               | 0.173273              | 0.126476              | 0.140799              |
| 2015 | 3    | 2.531358                              | 2.800502                              | 5.33186                                | 0.10659               | 0.490954              | 0.4881                |
| 2015 | 4    | 2.915005                              | 0.498011                              | 3.413016                               | 0.41805               | 0.090995              | 0.327054              |
| 2015 | 5    | 2.013047                              | 2.476068                              | 4.489115                               | 0.101204              | 0.158936              | 0.129727              |
| 2015 | 7    | 1.83                                  | 1.21                                  | 2.944496                               | 0.06                  | 0.07                  | NA                    |
| 2015 | 9    | 1.22093                               | 0.25                                  | 1.453445                               | 0.11127               | 0.01                  | 0.143663              |
| 2015 | 11   | 1.116283                              | 0.166385                              | 1.282669                               | 0.209437              | 0.055016              | 0.196753              |
| 2015 | 12   | 0.77                                  | 0.271957                              | 1.05045                                | 0.1838                | 0.022101              | 0.161292              |
| 2015 | 14   | 9.586615                              | 1.08495                               | 10.67157                               | 0.658968              | 0.295943              | 0.408357              |
| 2015 | 16   | 3.634229                              | 8.14                                  | 11.70804                               | 0.302435              | 1.393                 | 1.787397              |
| 2015 | 18   | 2.735525                              | 0.392058                              | 3.127583                               | 0.079292              | 0.293056              | 0.313838              |

|      |    |          |          |          |          |          |          |
|------|----|----------|----------|----------|----------|----------|----------|
| 2015 | 20 | 1.37     | 0.16     | 1.494396 | 0.0289   | 0.0643   | 0.020774 |
| 2015 | 22 | 1.353744 | 0.394033 | 1.747777 | 0.246938 | 0.339962 | 0.413958 |
| 2015 | 24 | 2.39     | 0.313642 | 2.677045 | 0.28     | 0.072618 | 0.358021 |
| 2015 | 26 | 1.272052 | 0.581541 | 1.853593 | 0.074504 | 0.037884 | 0.106918 |
| 2016 | 1  | 1.436667 | 0.553333 | 1.99     | 0.045092 | 0.095044 | 0.086603 |
| 2016 | 3  | 1.463333 | 6.116667 | 7.58     | 0.153731 | 0.332466 | 0.362905 |
| 2016 | 4  | 2.49     | 11.64    | 14.13    | NA       | NA       | NA       |
| 2016 | 5  | 0.883333 | 5.48     | 6.363333 | 0.102632 | 0.167033 | 0.183394 |
| 2016 | 7  | 1.066667 | 5.176667 | 6.243333 | 0.106927 | 0.202073 | 0.106927 |
| 2016 | 9  | 1.156667 | 4.52     | 5.676667 | 0.202567 | 0.420357 | 0.228108 |
| 2016 | 11 | 1.67     | 1.383333 | 1.94     | NA       | 0.120554 | 0.86885  |
| 2016 | 12 | 1.583333 | 1.2      | 2.783333 | 0.150444 | 0.147309 | 0.282902 |
| 2016 | 14 | 6.636667 | 1.616667 | 8.253333 | 0.768722 | 0.245832 | 0.645316 |
| 2016 | 16 | 3.406667 | 0.24     | 3.646667 | 0.106927 | 0.036056 | 0.12741  |
| 2016 | 18 | 2.75     | 0.396667 | 3.146667 | 0.121244 | 0.075056 | 0.058595 |
| 2016 | 20 | 1.406667 | 0.39     | 1.796667 | 0.068069 | 0.07     | 0.10504  |
| 2016 | 22 | 1.42     | 0.8      | 2.22     | 0.117898 | 0.079373 | 0.144222 |
| 2016 | 24 | 1.243333 | 0.473333 | 1.716667 | 0.140119 | 0.083865 | 0.105987 |
| 2016 | 26 | 0.823333 | 0.113333 | 0.936667 | 0.083267 | 0.015275 | 0.097125 |

865

|      |      | mean                     | mean                     | mean                      | standard deviation | standard deviation | standard deviation |
|------|------|--------------------------|--------------------------|---------------------------|--------------------|--------------------|--------------------|
| year | site | sm_upnit<br>(nmol/L/day) | lg_upnit<br>(nmol/L/day) | tot_upnit<br>(nmol/L/day) | sm_upnit           | lg_upnit           | tot_upnit          |
| 2015 | 1    | 126.537                  | 65.85543                 | 192.3924                  | 7.746767           | 14.21564           | 20.66745           |

|      |    |          |          |          |          |          |          |
|------|----|----------|----------|----------|----------|----------|----------|
| 2015 | 3  | 360.649  | 406.502  | 767.151  | 76.23357 | 163.9518 | 191.7983 |
| 2015 | 4  | 481.5605 | 117.6843 | 599.2448 | 57.97254 | 5.541328 | 52.43121 |
| 2015 | 5  | 255.933  | 387.2819 | 643.2149 | 22.77127 | 36.08576 | 40.91201 |
| 2015 | 7  | 145.48   | 164.8    | 330.6916 | 25.8     | 3.07     | NA       |
| 2015 | 9  | 68.6046  | 27.83    | 99.93725 | 11.23629 | 0.43     | 13.81445 |
| 2015 | 11 | 50.73533 | 16.99245 | 67.72778 | 3.744021 | 2.951693 | 3.147611 |
| 2015 | 12 | 33.72984 | 42.96051 | 76.69035 | 17.56143 | 1.327783 | 16.71017 |
| 2015 | 14 | 700.0781 | 89.2328  | 789.3109 | 50.56118 | 27.78318 | 31.92963 |
| 2015 | 16 | 442.6527 | 1083.56  | 1501.049 | 52.54894 | 171.5795 | 213.1177 |
| 2015 | 18 | 81.37914 | 23.79163 | 105.1708 | 5.995178 | 10.4649  | 11.39536 |
| 2015 | 20 | 52.09    | 11.99    | 64.87759 | 4.728152 | 2.171333 | 5.795378 |
| 2015 | 22 | 62.03894 | 23.87998 | 85.91892 | 16.68338 | 12.30874 | 22.79962 |
| 2015 | 24 | 71.54    | 21.52602 | 93.39189 | 18       | 6.112541 | 26.60459 |
| 2015 | 26 | 50.11906 | 51.91571 | 102.0348 | 9.799634 | 5.009725 | 14.40122 |
| 2016 | 1  | 104.79   | 76.35667 | 181.1467 | 15.3993  | 31.61021 | 46.85822 |
| 2016 | 3  | 276.5567 | 1350.32  | 1626.877 | 36.26867 | 7.136617 | 43.04111 |
| 2016 | 4  | 175.58   | 1433.59  | 1609.17  | NA       | NA       | NA       |
| 2016 | 5  | 38.20667 | 361.2    | 399.4067 | 6.825001 | 11.44844 | 17.74899 |
| 2016 | 7  | 44.10667 | 285.28   | 329.3867 | 2.17086  | 42.98332 | 42.41468 |
| 2016 | 9  | 124.5133 | 710.1967 | 834.71   | 30.24171 | 105.4086 | 76.82269 |
| 2016 | 11 | 152.69   | 238.27   | 289.1667 | NA       | 25.29497 | 66.36763 |
| 2016 | 12 | 70.66    | 106.9267 | 177.5867 | 8.333925 | 18.41769 | 26.63488 |
| 2016 | 14 | 385.41   | 137.5533 | 522.9633 | 49.11438 | 14.57516 | 42.55046 |
| 2016 | 16 | 313.23   | 47.31333 | 360.5433 | 23.72018 | 5.411851 | 25.37919 |
| 2016 | 18 | 272.04   | 70.41667 | 342.4567 | 17.9971  | 22.97238 | 18.07291 |

|      |    |          |          |          |          |          |          |
|------|----|----------|----------|----------|----------|----------|----------|
| 2016 | 20 | 108.0133 | 55.61333 | 163.6267 | 8.421546 | 3.769421 | 4.990394 |
| 2016 | 22 | 129.8633 | 131.64   | 261.5033 | 25.61031 | 22.77144 | 47.29522 |
| 2016 | 24 | 147.0733 | 113.4967 | 260.57   | 6.511777 | 23.69947 | 30.02869 |
| 2016 | 26 | 45.51667 | 14.49333 | 60.01    | 4.736521 | 1.128952 | 5.528173 |

866

867

868

869

870

871

872

873

874

875

876

877

878

879

880

881

882

883

884

885

886 **Supplementary Table 4.**

887 Results of the envfit() function. See supplementary Figure 2 for abbreviated variable key.

| Variable  | Whole Community |           | Dinoflagellates |           | Chlorophytes |         | Diatoms |       |
|-----------|-----------------|-----------|-----------------|-----------|--------------|---------|---------|-------|
|           | r2              | p         | r2              | p         | r2           | p       | r2      | p     |
| sil       | 0.415           | 0.030 *   | 0.3567          | 0.06      | 0.0182       | 0.881   | 0.2029  | 0.226 |
| sm_upnit  | 0.2718          | 0.123     | 0.0656          | 0.651     | 0.179        | 0.273   | 0.249   | 0.154 |
| lg_upnit  | 0.6574          | 0.002 **  | 0.2137          | 0.197     | 0.0575       | 0.742   | 0.1827  | 0.269 |
| sm_updic  | 0.3484          | 0.052 .   | 0.3797          | 0.037 *   | 0.197        | 0.259   | 0.273   | 0.117 |
| lg_updic  | 0.5786          | 0.006 **  | 0.1838          | 0.256     | 0.1558       | 0.383   | 0.1115  | 0.458 |
| syn       | 0.7271          | 0.002 **  | 0.5775          | 0.004 **  | 0.4139       | 0.019 * | 0.009   | 0.94  |
| tot_upnit | 0.6137          | 0.005 **  | 0.1051          | 0.471     | 0.0155       | 0.914   | 0.2468  | 0.151 |
| pico      | 0.2389          | 0.177     | 0.4262          | 0.031 *   | 0.5652       | 0.011 * | 0.0351  | 0.784 |
| pro       | 0.6623          | 0.001 *** | 0.3481          | 0.069 .   | 0.3555       | 0.070 . | 0.1152  | 0.474 |
| pden_dl   | 0.6229          | 0.002 **  | 0.7299          | 0.001 *** | 0.1149       | 0.488   | 0.0922  | 0.526 |
| temp_ml   | 0.4246          | 0.023 *   | 0.3341          | 0.078 .   | 0.1065       | 0.48    | 0.1096  | 0.467 |

888

889

890

891

892

893

894

895

896

897

898

899

900

901

902 **Supplementary Table 5.**

903 Table with the values of depth, temperature, salinity, and density of the mixed (ML) and

904 subthermocline (DL) layers obtained from CTD profiles.

905

| site | Year | Depth (m) |        | Potential Density $\rho_\theta$ (kg/m <sup>3</sup> ) |          | Salinity (PSU) |          | Temperature (°C) |          |
|------|------|-----------|--------|------------------------------------------------------|----------|----------------|----------|------------------|----------|
|      |      | DL        | ML     | DL                                                   | ML       | DL             | ML       | DL               | ML       |
| 1    | 2015 | 74.574    | 41.765 | 1025.542                                             | 1023.962 | 35.07884       | 35.00383 | 17.15188         | 22.91208 |
| 3    | 2015 | 54.691    | 27.844 | 1025.282                                             | 1023.797 | 35.15576       | 34.94609 | 18.45271         | 23.33218 |
| 4    | 2015 | 58.667    | 4.972  | 1025.361                                             | 1022.756 | 35.15721       | 34.40935 | 18.14003         | 25.45745 |
| 5    | 2015 | 57.673    | 26.85  | 1025.231                                             | 1023.143 | 35.09401       | 34.58523 | 18.46886         | 24.62226 |
| 7    | 2015 | 44.748    | 21.878 | 1025.208                                             | 1022.855 | 35.11656       | 34.4859  | 18.62759         | 25.32338 |
| 9    | 2015 | 65.627    | 35.799 | 1025.274                                             | 1023.392 | 35.00837       | 34.77897 | 18.0309          | 24.28077 |
| 11   | 2015 | 57.673    | 10.939 | 1024.982                                             | 1021.94  | 35.00771       | 33.71368 | 19.18724         | 26.39509 |
| 12   | 2015 | 58.667    | 29.833 | 1024.497                                             | 1023.276 | 34.96258       | 34.70075 | 20.89355         | 24.46823 |
| 14   | 2015 | 65.627    | 18.895 | 1024.493                                             | 1022.858 | 34.79039       | 34.51659 | 20.42436         | 25.38764 |
| 16   | 2015 | 61.65     | 51.708 | 1025.428                                             | 1023.722 | 35.05016       | 34.91046 | 17.53284         | 23.50124 |
| 18   | 2015 | 70.598    | 42.759 | 1025.502                                             | 1023.586 | 35.04397       | 34.87231 | 17.20571         | 23.8639  |
| 20   | 2015 | 69.604    | 38.782 | 1025.196                                             | 1023.289 | 35.0318        | 34.70571 | 18.41766         | 24.43836 |
| 22   | 2015 | 62.644    | 20.884 | 1025.248                                             | 1023.283 | 35.07092       | 34.6674  | 18.32925         | 24.35941 |
| 24   | 2015 | 48.725    | 0.995  | 1025.424                                             | 1022.598 | 35.10714       | 33.9286  | 17.72452         | 24.7792  |
| 26   | 2015 | 65.627    | 26.85  | 1025.393                                             | 1022.549 | 35.11794       | 34.16701 | 17.88783         | 25.53792 |
| 1    | 2016 | 52.702    | 8.95   | 1026.097                                             | 1023.58  | 34.97879       | 34.21174 | 14.35497         | 22.14076 |
| 3    | 2016 | 25.856    | 6.961  | 1026.06                                              | 1025.435 | 34.9931        | 34.93188 | 14.57929         | 17.1086  |
| 4    | 2016 | 28.839    | 6.961  | 1026.049                                             | 1025.219 | 35.00383       | 34.95251 | 14.67041         | 18.06521 |
| 5    | 2016 | 49.719    | 1.989  | 1025.933                                             | 1024.737 | 34.99287       | 34.699   | 15.15999         | 19.21015 |
| 7    | 2016 | 27.844    | 13.923 | 1025.944                                             | 1024.843 | 35.0016        | 34.86895 | 15.14143         | 19.30295 |
| 9    | 2016 | 51.708    | 19.889 | 1025.828                                             | 1023.652 | 34.97766       | 34.28081 | 15.5809          | 22.07181 |
| 11   | 2016 | 47.731    | 16.906 | 1025.993                                             | 1024.203 | 34.9684        | 34.42807 | 14.79943         | 20.46199 |
| 12   | 2016 | 42.759    | 7.956  | 1026.054                                             | 1024.023 | 34.97158       | 34.33695 | 14.52727         | 20.87326 |
| 14   | 2016 | 26.85     | 22.872 | 1024.625                                             | 1024.115 | 34.88242       | 34.47773 | 20.18936         | 20.93247 |
| 16   | 2016 | 57.673    | 11.934 | 1026.055                                             | 1024.434 | 34.967         | 34.58984 | 14.5104          | 20.05481 |
| 18   | 2016 | 60.656    | 9.945  | 1026.007                                             | 1024.358 | 34.97825       | 34.58253 | 14.77365         | 20.32207 |
| 20   | 2016 | 46.736    | 38.782 | 1025.991                                             | 1023.382 | 34.98953       | 34.00239 | 14.88439         | 22.28094 |
| 22   | 2016 | 31.822    | 14.917 | 1025.946                                             | 1023.796 | 35.00014       | 34.24421 | 15.12943         | 21.45189 |
| 24   | 2016 | 45.742    | 10.939 | 1026.012                                             | 1023.403 | 35.01254       | 33.97096 | 14.86899         | 22.11866 |
| 26   | 2016 | 69.604    | 32.816 | 1025.977                                             | 1022.714 | 34.98422       | 33.64359 | 14.93502         | 23.66572 |

906

907



908 **References**

- 909 Anderson, D. M., Coats, D. W. and Tyler, M. A. (1985) 'Encystment of the dinoflagellate  
910 *Gyrodinium uncatenum*: temperature and nutrient effects', *Journal of Phycology*, 21(2),  
911 pp.200-206.
- 912 Barber, R. T., Sanderson, M.P., Lindley, S.T., Chai, F., Newton, J., Trees, C.C., Foley, D.G. and  
913 Chavez, F.P. (1996) 'Primary productivity and its regulation in the equatorial Pacific  
914 during and following the 1991–1992 El Niño', *Deep Sea Research Part II: Topical  
915 Studies in Oceanography*, 43(4–6), pp. 933–969.
- 916 Barber, R. T. and Chavez, F. P. (1991) 'Regulation of primary productivity rate in the equatorial  
917 Pacific', *Limnology and Oceanography*, 36(1), pp. 1803–8.
- 918 Behrenfeld, M. J., Bale, A.J., Kolber, Z.S., Aiken, J. and Falkowski, P.G. (1996) 'Confirmation  
919 of iron limitation of phytoplankton photosynthesis in the equatorial Pacific Ocean',  
920 *Nature*, 383(6600), pp. 508–511.
- 921 Bensted-Smith, R. (1998) 'The special law for Galápagos', *Noticias de Galápagos*, 59(6).
- 922 Brand, L. E., Guillard, R. R. L. and Murphy, L. S. (1981) 'A method for the rapid and precise  
923 determination of acclimated phytoplankton reproduction rates', *Journal of Plankton  
924 Research*, 3(2), pp. 193–201.
- 925 Bravo, I. and Figueroa, R. (2014) 'Towards an Ecological Understanding of Dinoflagellate Cyst  
926 Functions', *Microorganisms*, 2(1), pp. 11–32.
- 927 Bronk, D. A., Glibert, P. M. and Ward, B. B. (1994) 'Nitrogen uptake, dissolved organic  
928 nitrogen release, and new production', *Science*, 265(5180), pp. 1843–1846.
- 929 Carnicer, O., De La Fuente, P., Canepa, A., Keith, I., Rebolledo-Monsalve, E., Diogène, J. and  
930 Fernández-Tejedor, M. (2019) 'Marine Dinoflagellate Assemblage in the Galápagos

- 931 Marine Reserve’, *Frontiers in Marine Science*, 6, p.235.
- 932 Chavez, F. P., Buck, K.R., Service, S.K., Newton, J. and Barber, R.T. (1996) ‘Phytoplankton  
933 variability in the central and eastern tropical pacific’, *Deep-Sea Research Part II: Topical  
934 Studies in Oceanography*, 43(4-6), pp.835-870.
- 935 Chavez, F. P. and Brusca, R. C. (1991) ‘The Galápagos Islands and Their Relation to  
936 Oceanographic Processes in the Tropical Pacific’, In *Galapagos marine  
937 invertebrates* (pp. 9-33). Springer, Boston, MA.
- 938 Clarke, K. R. and Ainsworth, M. (1993) ‘A method of linking multivariate community structure  
939 to environmental variables’, *Marine Ecology Progress Series*, 92(3), pp. 205–219.
- 940 Clarke, L. J. *et al.* (2019) ‘A globally distributed Syndiniales parasite dominates the Southern  
941 Ocean micro-eukaryote community near the sea-ice edge’, *ISME Journal*. Springer US,  
942 13(3), pp. 734–737.
- 943 Collado-Fabbri, S., Vaultot, D. and Ulloa, O. (2011) ‘Structure and seasonal dynamics of the  
944 eukaryotic picophytoplankton community in a wind-driven coastal upwelling ecosystem’,  
945 *Limnology and Oceanography*, 56(6), pp. 2334–2346.
- 946 De Vargas, C., Audic, S., Henry, N., Decelle, J., Mahé, F., Logares, R., Lara, E., Berney, C., Le  
947 Bescot, N., Probert, I. and Carmichael, M. (2015) ‘Eukaryotic plankton diversity in the  
948 sunlit ocean’, *Science*, 348(6237).
- 949 Dugdale, R. C. and Goering, J. J. (1967) ‘Uptake of new and regenerated forms of nitrogen in  
950 primary productivity’, *Limnology and Oceanography*, 12(2), pp.196-206.
- 951 Edgar, G. J., Bustamante, R.H., Farina, J.M., Calvopina, M., Martinez, C. and Toral-Granda,  
952 M.V. (2004) ‘Bias in evaluating the effects of marine protected areas: The importance of  
953 baseline data for the Galapagos Marine Reserve’, *Environmental Conservation*, pp.212-

- 954 218.
- 955 Feldman, G. C. (1986) 'Patterns of phytoplankton production around the Galapagos Islands', In  
956 *Tidal Mixing and Plankton Dynamics* (pp. 77-106). Springer, New York, NY.
- 957 Fiedler, P. C. and Talley, L. D. (2006) 'Hydrography of the eastern tropical Pacific: A review',  
958 *Progress in Oceanography*, 69(2-4), pp. 143-180.
- 959 Gifford, S. M., Zhao, L., Stemple, B., DeLong, K., Medeiros, P.M., Seim, H. and Marchetti, A.  
960 (2020) 'Microbial Niche Diversification in the Galápagos Archipelago and Its Response  
961 to El Niño', *Frontiers in Microbiology*, 11, p.2636.
- 962 Guillou, L., Virey, M., Chambouvet, A., Welsh, R.M., Kirkham, A.R., Massana, R., Scanlan,  
963 D.J. and Worden, A.Z. (2008) 'Widespread occurrence and genetic diversity of marine  
964 parasitoids belonging to Syndiniales (Alveolata)', *Environmental microbiology*, 10(12),  
965 pp.3349-3365.
- 966 Hama, T., Miyazaki, T., Ogawa, Y., Iwakuma, T., Takahashi, M., Otsuki, A. and Ichimura, S.  
967 (1983) 'Measurement of Photosynthetic Production of a Marine Phytoplankton  
968 Population Using a Stable  $^{13}\text{C}$  Isotope', *Marine Biology*, 73(1), pp. 31-36.
- 969 Hoppenrath, M., Murray, S.A., Chomérat, N. and Horiguchi, T. (2014) Marine benthic  
970 dinoflagellates: unveiling their worldwide biodiversity.
- 971 Jakoboski, J., Todd, R.E., Owens, W.B., Karnauskas, K.B. and Rudnick, D.L. (2020)  
972 'Bifurcation and upwelling of the equatorial undercurrent west of the Galápagos  
973 archipelago', *Journal of Physical Oceanography*, 50(4), pp. 887-905.
- 974 Jephcott, T. G., Alves-De-Souza, C., Gleason, F.H., Van Ogtrop, F.F., Sime-Ngando, T.,  
975 Karpov, S.A. and Guillou, L. (2016) 'Ecological impacts of parasitic chytrids, syndiniales  
976 and perkinsids on populations of marine photosynthetic dinoflagellates', *Fungal Ecology*.

- 977 Elsevier, 19, pp. 47–58.
- 978 Johnson, Z., I. Shyam, R., Ritchie, A.E., Mioni, C., Lance, V.P., Murray, J.W. and Zinser, E.R.  
979 (2010) ‘The effect of iron-and light-limitation on phytoplankton communities of deep  
980 chlorophyll maxima of the western Pacific Ocean’, *Journal of Marine Research*, 68(2),  
981 pp. 283–308.
- 982 Kessler, W. S. (2006) ‘The circulation of the eastern tropical Pacific: A review’, *Progress in*  
983 *Oceanography*, 69(2-4), pp.181-217.
- 984 Kislik, E., Mantilla, G., Torres, G. and Borbor-Córdova, M. (2017) ‘Biological Hotspots in the  
985 Galápagos Islands: Exploring Seasonal Trends of Ocean Climate Drivers to Monitor  
986 Algal Blooms’, *International Scholarly and Scientific Research & Innovation*, 11(12), pp.  
987 824–834.
- 988 Lindley, S. T. and Barber, R. T. (1998) ‘Phytoplankton response to natural and experimental iron  
989 addition’, *Deep-Sea Research Part II: Topical Studies in Oceanography*, 45(6), pp.  
990 1135–1150.
- 991 Liu, Y., Xie, L., Morrison, J.M., Kamykowski, D. and Sweet, W.V. (2014) ‘Ocean Circulation  
992 and Water Mass Characteristics around the Galápagos Archipelago Simulated by a  
993 Multiscale Nested Ocean Circulation Model’, *International Journal of Oceanography*,  
994 pp. 1–16.
- 995 Lopes Dos Santos, A., Pollina, T., Gourvil, P., Corre, E., Marie, D., Garrido, J.L., Rodríguez, F.,  
996 Noël, M.H., Vaultot, D. and Eikrem, W. (2017) ‘Chloropicophyceae, a new class of  
997 picophytoplanktonic prasinophytes’, *Scientific Reports*, 7(1), pp. 1–20.
- 998 Marchetti, A., Varela, D.E., Lance, V.P., Lance, V.P., Palmucci, M., Giordano, M. and Virginia  
999 Armbrust, E. (2010) ‘Iron and silicic acid effects on phytoplankton productivity,

- 1000 diversity, and chemical composition in the central equatorial Pacific Ocean’, *Limnology*  
1001 *and Oceanography*, 55(1), pp. 11–29.
- 1002 Marie, D., Simon, N. and Vaultot, D. (2005) ‘Phytoplankton cell counting by flow cytometry’,  
1003 *Algal culturing techniques*. Elsevier Academic Press Burlington, MA, 1, pp. 253–267.
- 1004 Masotti, I., Moulin, C., Alvain, S., Bopp, L., Tagliabue, A. and Antoine, D. (2011) ‘Large-scale  
1005 shifts in phytoplankton groups in the Equatorial Pacific during ENSO  
1006 cycles’, *Biogeosciences*, 8(3), pp.539-550.
- 1007 Maxwell, D.C., (1975) ‘Marine primary productivity of the Galapagos archipelago’, (Doctoral  
1008 dissertation, The Ohio State University).
- 1009 McCulloch, A. (2011) ‘A Spatio-Temporal Context for the Phytoplankton Community Patterns  
1010 of the Galapagos Archipelago and the Northwest Florida Shelf’, (Doctoral dissertation,  
1011 North Carolina State University).
- 1012 Moore, L. R., Post, A.F., Rocap, G. and Chisholm, S.W. (2002) ‘Utilization of different nitrogen  
1013 sources by the marine cyanobacteria *Prochlorococcus* and *Synechococcus*’, *Limnology*  
1014 *and Oceanography*, 47(4), pp. 989–996.
- 1015 Naranjo, C. and Tapia, M. E. (2015) ‘Plancton en el canal bolívar de la isla isabela (caleta tagus),  
1016 islas galápagos durante marzo de 2009.’, *Acta Oceanográfica del Pacífico*, 20(1).
- 1017 Palacios, D. M. (2002) ‘Factors influencing the island-mass effect of the Galápagos  
1018 Archipelago’, *Geophysical Research Letters*, 29(23), pp.49-1.
- 1019 Palacios, D. M. (2004) ‘Seasonal patterns of sea-surface temperature and ocean color around the  
1020 Galápagos: Regional and local influences’, *Deep-Sea Research Part II: Topical Studies*  
1021 *in Oceanography*, 51(1-3), pp.43-57.
- 1022 Park, J., Dunne, J. P. and Stock, C. A. (2018) ‘Ocean chlorophyll as a precursor of ENSO: An

- 1023 earth system modeling study’, *Geophysical Research Letters*, 45(4), pp.1939-1947.
- 1024 Pennington, J. T., Mahoney, K.L., Kuwahara, V.S., Kolber, D.D., Calienes, R. and Chavez, F.P.
- 1025 (2006) ‘Primary production in the eastern tropical Pacific: A review’, *Progress in*
- 1026 *Oceanography*, 69(2-4), pp.285-317.
- 1027 Pitcher, G. C., Walker, D.R., Mitchell-Innes, B.A. and Moloney, C.L. (1991) ‘Short-term
- 1028 variability during an anchor station study in the southern Benguela upwelling system:
- 1029 Phytoplankton dynamics’, *Progress in Oceanography*. Pergamon, 28(1–2), pp. 39–64.
- 1030 Pospelova, V. and Head, M. J. (2002) ‘*Islandinium brevispinosum* sp. nov. (Dinoflagellata), a
- 1031 new organic-walled dinoflagellate cyst from modern estuarine sediments of New England
- 1032 (USA)’, *Journal of Phycology*, 38(3), pp. 593–601.
- 1033 Quigley, K. M., Davies, S.W., Kenkel, C.D., Willis, B.L., Matz, M.V. and Bay, L.K. (2014)
- 1034 ‘Deep-Sequencing Method for Quantifying Background Abundances of Symbiodinium
- 1035 Types: Exploring the Rare Symbiodinium Biosphere in Reef-Building Corals’, *PLoS*
- 1036 *ONE*, 9(4), p. e94297.
- 1037 Rafter, P. A., Sigman, D. M. and Mackey, K. R. M. (2017) ‘Recycled iron fuels new production
- 1038 in the eastern equatorial Pacific Ocean’, *Nature Communications*. Springer US, 8(1).
- 1039 Rii, Y. M., Duhamel, S., Bidigare, R.R., Karl, D.M., Repeta, D.J. and Church, M.J. (2016)
- 1040 ‘Diversity and productivity of photosynthetic picoeukaryotes in biogeochemically distinct
- 1041 regions of the South East Pacific Ocean’, *Limnology and Oceanography*, 61(3), pp. 806–
- 1042 824.
- 1043 Sakamoto, C. M., Millero, F.J., Yao, W., Friederich, G.E. and Chavez, F.P. (1998) ‘Surface
- 1044 seawater distributions of inorganic carbon and nutrients around the Galapagos Islands:
- 1045 Results from the PlumEx experiment using automated chemical mapping’, *Deep-Sea*

- 1046            *Research Part II: Topical Studies in Oceanography*, 45(6), pp. 1055–1071.
- 1047 Salomon, P. and Stolte, W. (2010) ‘Predicting the population dynamics in Amoebophrya  
1048 parasitoids and their dinoflagellate hosts using a mathematical model’, *Marine Ecology*  
1049 *Progress Series*, 419, pp. 1–10.
- 1050 Santoso, A., Mcphaden, M. J. and Cai, W. (2017) ‘The Defining Characteristics of ENSO  
1051 Extremes and the Strong 2015/2016 El Niño’, *Reviews of Geophysics*, 55(4), pp. 1079–  
1052 1129.
- 1053 Sartory, D. P. and Grobbelaar, J. U. (1984) ‘Extraction of chlorophyll a from freshwater  
1054 phytoplankton for spectrophotometric analysis’, *Hydrobiologia*. Springer, 114(3), pp.  
1055 177–187.
- 1056 Schaeffer, B. A., B.A., Morrison, J.M., Kamykowski, D., Feldman, G.C., Xie, L., Liu, Y., Sweet,  
1057 W., McCulloch, A. and Banks, S. (2008) ‘Phytoplankton biomass distribution and  
1058 identification of productive habitats within the Galapagos Marine Reserve by MODIS, a  
1059 surface acquisition system, and in-situ measurements’, *Remote Sensing of Environment*.  
1060 Elsevier, 112(6), pp. 3044–3054.
- 1061 Shang, L., Hu, Z., Deng, Y., Liu, Y., Zhai, X., Chai, Z., Liu, X., Zhan, Z., Dobbs, F.C. and Tang,  
1062 Y.Z. (2019) ‘Metagenomic sequencing identifies highly diverse assemblages of  
1063 dinoflagellate cysts in sediments from ships’ ballast tanks’, *Microorganisms*, 7(8), p.250.
- 1064 Slawyk, G., Collos, Y. and Auclair, J. (1977) ‘The use of the <sup>13</sup>C and <sup>15</sup>N isotopes for the  
1065 simultaneous measurement of carbon and nitrogen turnover rates in marine  
1066 phytoplankton’, *Limnology and Oceanography*, 22(5), pp. 925–932.
- 1067 Smayda, T. J. (2000) ‘Ecological features of harmful algal blooms in coastal upwelling  
1068 ecosystems’, *African Journal of Marine Science*, 22.

- 1069 Smayda, T. J. and Trainer, V. L. (2010) ‘Dinoflagellate blooms in upwelling systems: Seeding,  
1070 variability, and contrasts with diatom bloom behaviour’. *Progress in*  
1071 *Oceanography*, 85(1-2), pp.92-107.
- 1072 Sweet, W. V., Morrison, J.M., Kamykowski, D., Schaeffer, B.A., Banks, S. and McCulloch, A.  
1073 (2007) ‘Water mass seasonal variability in the Galápagos Archipelago’, *Deep-Sea*  
1074 *Research Part I: Oceanographic Research Papers*, 54(12), pp.2023-2035.
- 1075 Tapia, M. and Naranjo, C. (2012) ‘Aspectos oceanográficos del plancton y su relación con el  
1076 frente ecuatorial, durante septiembre del 2011’, *Acta Oceanográfica del Pacífico*,  
1077 17(5934), pp.67-91.
- 1078 Tilstone, G. H., Taylor, B.H., Blondeau-Patissier, D., Powell, T., Groom, S.B., Rees, A.P. and  
1079 Lucas, M.I. (2015) ‘Comparison of new and primary production models using SeaWiFS  
1080 data in contrasting hydrographic zones of the northern North Atlantic’, *Remote Sensing of*  
1081 *Environment*, 156, pp.473-489.
- 1082 Torres, G. (1998) ‘Variabilidad anual del fitoplancton marino en áreas costeras de La Libertad y  
1083 Manta (Ecuador), su inter-relación con eventos El Niño’, *Acta Oceanográfica del*  
1084 *Pacífico, INOCAR*, 9(1), pp.115-128.
- 1085 Torres, G. and Tapia, M.E., 1998. Distribución del primer nivel trófico (fitoplancton) en el  
1086 Pacífico ecuatoriano, período 1996-1997 (pre-El Niño). *Acta Oceanográfica del*  
1087 *Pacífico*, 9(1).
- 1088 Torres, G. and Tapia, M. (2000) ‘Distribución del fitoplancton y su comportamiento en el  
1089 afloramiento en las Islas Galápagos’, *Acta Oceanográfica del Pacífico*, 10(1), pp.137-150.
- 1090 Torres, G. and Tapia, M. (2002) ‘Distribución del fitoplancton en la región costera del mar  
1091 ecuatoriano, durante diciembre 2000’, *Acta Oceanográfica del Pacífico*, 11(1).



1092 Yokouchi, K., Onuma, R. and Horiguchi, T. (2018) ‘Ultrastructure and phylogeny of a new  
1093 species of mixotrophic dinoflagellate, *Paragymnodinium stigmaticum* sp. nov.  
1094 (Gymnodiniales, Dinophyceae)’, *Phycologia*, 57(5), pp. 539–554. doi: 10.2216/17-140.1.

1095

1096

1097

1098

1099

1100

1101

1102

1103

1104

1105

1106

1107

1108

1109

1110

1111

1112

1113

1114

1115 **Acknowledgments**

1116           We thank scientists and staff from the Galápagos Science Center (GSC), Universidad San  
1117 Francisco de Quito (USFQ), and Galápagos National Park (GNP) for their logistical support  
1118 during the cruises. We are grateful to Steve Walsh (UNC), Carlos Mena (USFQ) and Phil Page  
1119 (UNC) for their efforts in coordinating the Galápagos Marine Expeditions. Others include Juan  
1120 Pablo Muñoz (GSC), Leandro Vaca (GSC), Eduardo Espinoza (GNP), Jennifer Suarez (GNP)  
1121 and the crew of the M/V Sierra Negra. We thank Sara Haines for assistance with processing and  
1122 visualizing physical and chemical observations. We are grateful to Kimberly DeLong, Sharla  
1123 Sugierski and Wilton Burns for assistance with sample analyses. Natalie Cohen, Rob Lampe, and  
1124 Se Hyeon Jang provided helpful comments on the manuscript. Funding for this project was  
1125 provided to A.M., H.S. and S.G from the Center for Galápagos Studies (Office of the Vice  
1126 Chancellor for Research) and the UNC College of Arts and Sciences, to E.N. by the Andrew  
1127 Marion Blackmon family trust and a National Science Foundation grant to A.M. (OCE1751805).  
1128
